# Supplementary material for: A Ag2CO3/TFA-catalyzed intramolecular annulation approach to imidazo[1,2-c][1,3]oxazin-5-one derivatives
Source: Royal Society of Chemistry journal article supplement (doi:10.1039/d1ob02352g), 2022-01-01
Supplement: d1ob02352g1.pdf [file d1ob02352g1.pdf]

## Supporting Information

### **Ag<sub>2</sub>CO<sub>3</sub>/TFA Catalyzed Intramolecular Annulation Approach to Imidazo[1,2-*c*][1,3]oxazin-5-one Derivatives**

Abdelkarim El Qami,<sup>a, b</sup> Badr Jismy,<sup>a,\*</sup> Mohamed Akssira,<sup>b</sup> Johan Jacquemin,<sup>a</sup> Abdellatif Tikad,<sup>c,\*</sup> and Mohamed Abarbri<sup>a,\*</sup>

<sup>a</sup> Laboratoire de Physico-Chimie des Matériaux et des Electrolytes pour l'Energie (PCM2E), EA 6299. Université de Tours, Faculté des Sciences et Techniques. Avenue Monge Faculté des Sciences, Parc de Grandmont, 37200 Tours, France. Phone: (+33) 2 47 36 73 59 / (+33) 6 70 22 15 77, fax: (+33) 2 47 36 70 73, e-mail: [mohamed.abarbri@univ-tours.fr](mailto:mohamed.abarbri@univ-tours.fr)

<sup>b</sup> Laboratoire de Chimie Physique et de Chimie Bioorganique, URAC 22. Faculté des Sciences et Techniques de Mohammedia, Université Hassan II de Casablanca. B.P. 146, 28800 Mohammedia, Morocco.

<sup>c</sup> Laboratoire de Chimie Moléculaire et Substances Naturelles, Faculté des Sciences, Université Moulay Ismail, B.P. 11201, Zitoune, Meknès, Morocco.

### Contents:

|                                                                                        |         |
|----------------------------------------------------------------------------------------|---------|
| 1. Optimizations of Suzuki-Miyaura and Sonogashira cross-couplings at C-2 of <b>2a</b> | S2      |
| 2. <sup>1</sup> H and <sup>13</sup> C NMR spectra of products                          | S3-S37  |
| 3. Details of DFT calculations                                                         | S38-S39 |

## 1. Optimizations of Suzuki-Miyaura and Sonogashira cross-couplings at C-2 of 2a

**Table S1. Optimization of Suzuki-Miyaura cross-coupling between 2a and 4-methoxyphenylboronic acid.**

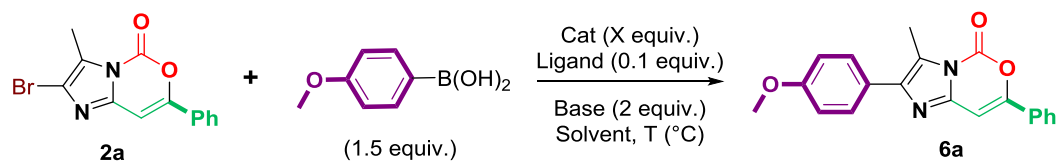

| Entry    | Solvent                               | Catalyst (equiv.)                                        | Base                               | Ligand       | T (°C)            | Time (h) | 6a/2a            |
|----------|---------------------------------------|----------------------------------------------------------|------------------------------------|--------------|-------------------|----------|------------------|
| 1        | Dioxane/H <sub>2</sub> O (4/1)        | PdCl <sub>2</sub> dppf (0.1)                             | Na <sub>2</sub> CO <sub>3</sub>    | -            | 65                | 1        | - <sup>b</sup>   |
| 2        | DME/EtOH/H <sub>2</sub> O (3/1/1)     | Pd(OAc) <sub>2</sub> (0.04)                              | Na <sub>2</sub> CO <sub>3</sub>    | -            | 65 <sup>[a]</sup> | 1        | - <sup>b</sup>   |
| 3        | Toluène/MeOH (4/1)                    | PdPPh <sub>3</sub> (0.1)                                 | Na <sub>2</sub> CO <sub>3</sub>    | -            | 80                | 1        | - <sup>b</sup>   |
| 4        | Toluène/H <sub>2</sub> O (5/0.5)      | PdCl <sub>2</sub> (PPh <sub>3</sub> ) <sub>2</sub> (0.1) | Na <sub>2</sub> CO <sub>3</sub>    | -            | 80                | 1        | - <sup>b</sup>   |
| 5        | Toluène/H <sub>2</sub> O (5/0.5)      | PdCl <sub>2</sub> (PPh <sub>3</sub> ) <sub>2</sub> (0.1) | K <sub>3</sub> PO <sub>4</sub>     | -            | 80                | 24       | 6/94             |
| 6        | Toluene/H <sub>2</sub> O (5/0.5)      | Pd <sub>2</sub> (dba) <sub>3</sub> (0.025)               | K <sub>3</sub> PO <sub>4</sub>     | -            | 110               | 24       | 12/88            |
| <b>7</b> | <b>Toluene/H<sub>2</sub>O (5/0.5)</b> | <b>Pd<sub>2</sub>(dba)<sub>3</sub> (0.025)</b>           | <b>K<sub>3</sub>PO<sub>4</sub></b> | <b>XPhos</b> | <b>110</b>        | <b>1</b> | <b>100/0</b>     |
| 8        | EtOH/H <sub>2</sub> O (4/1)           | XPhosPdG <sub>2</sub> (0.1)                              | K <sub>2</sub> CO <sub>3</sub>     | Xphos        | 65 <sup>a</sup>   | 1        | - <sup>[b]</sup> |

<sup>a</sup>Reaction was performed under microwave irradiation. <sup>b</sup>Degradation of the reaction.

**Table S2. Optimization of Sonogashira cross-coupling between 2a and phenylacetylene.**

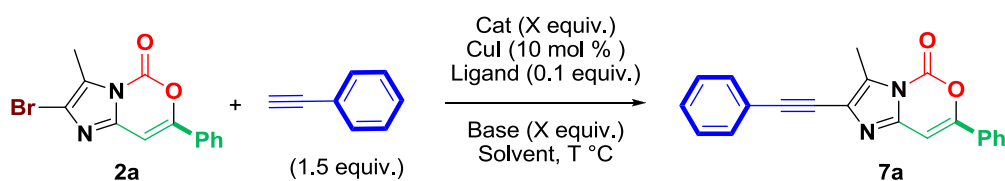

| Entry          | Solvent                           | Catalyst (equiv.)                                        | Base (equiv.)           | Ligand            | T(°C)     | Time (h) | 7a/2a          |
|----------------|-----------------------------------|----------------------------------------------------------|-------------------------|-------------------|-----------|----------|----------------|
| 1              | Toluène                           | PdCl <sub>2</sub> (PPh <sub>3</sub> ) <sub>2</sub> (0.1) | Et <sub>3</sub> N (5.0) | PPh <sub>3</sub>  | 110       | 48       | 0/100          |
| 2              | Et <sub>3</sub> N                 | PdCl <sub>2</sub> (PPh <sub>3</sub> ) <sub>2</sub> (0.1) | --                      | --                | 110       | 48       | 0/100          |
| 3              | Et <sub>3</sub> N                 | PdCl <sub>2</sub> (PPh <sub>3</sub> ) <sub>2</sub> (0.1) | --                      | AsPh <sub>3</sub> | 110       | 48       | 0/100          |
| <b>4</b>       | <b>Et<sub>3</sub>N</b>            | <b>Pd<sub>2</sub>(dba)<sub>3</sub> (0.05)</b>            | <b>--</b>               | <b>XPhos</b>      | <b>80</b> | <b>1</b> | <b>100/0</b>   |
| 5 <sup>a</sup> | DME/EtOH/H <sub>2</sub> O (3/1/1) | Pd(OAc) <sub>2</sub> (0.04)                              | Et <sub>3</sub> N (2.0) | PPh <sub>3</sub>  | 70        | 1        | - <sup>b</sup> |

<sup>a</sup>Reaction carried out under microwave irradiation. <sup>b</sup>Degradation of the reaction

## 2. $^1\text{H}$ and $^{13}\text{C}$ NMR spectra of products

### $^1\text{H}$ NMR (300 MHz, $\text{CDCl}_3$ ) of **2a**

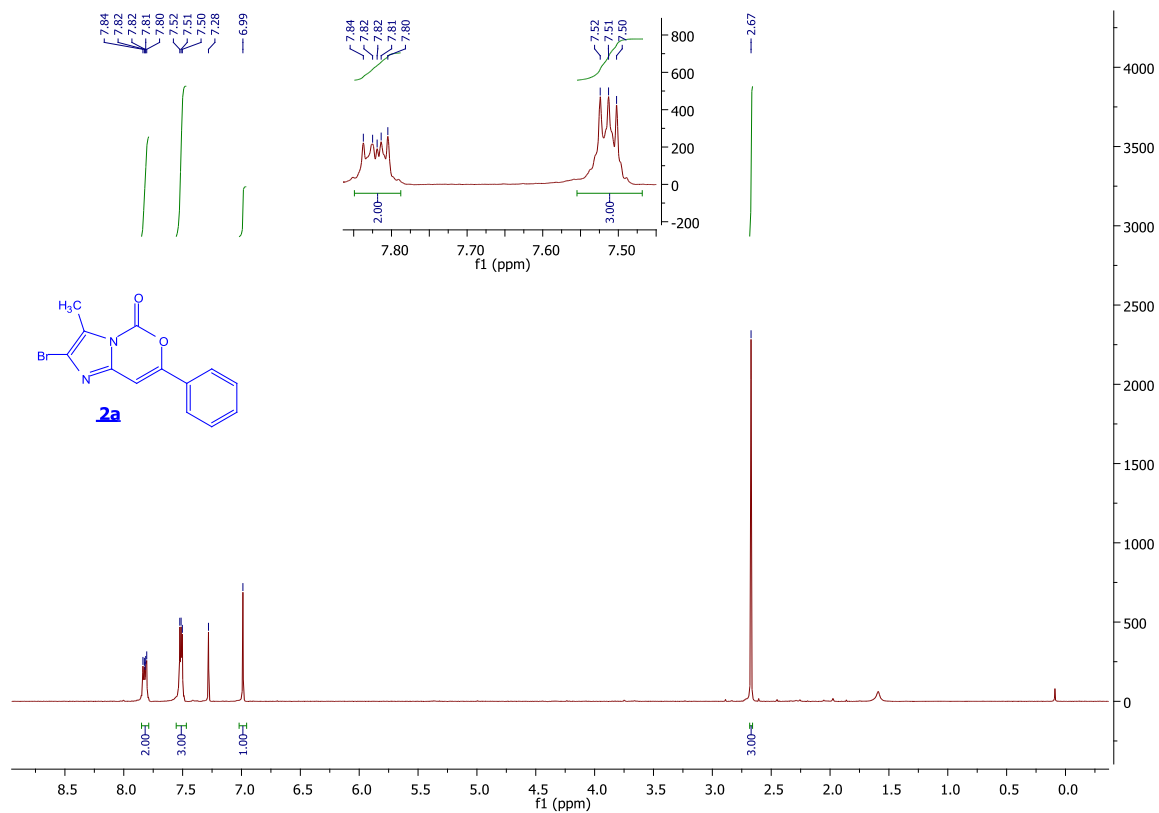

### $^{13}\text{C}$ NMR (75 MHz, $\text{CDCl}_3$ ) of **2a**

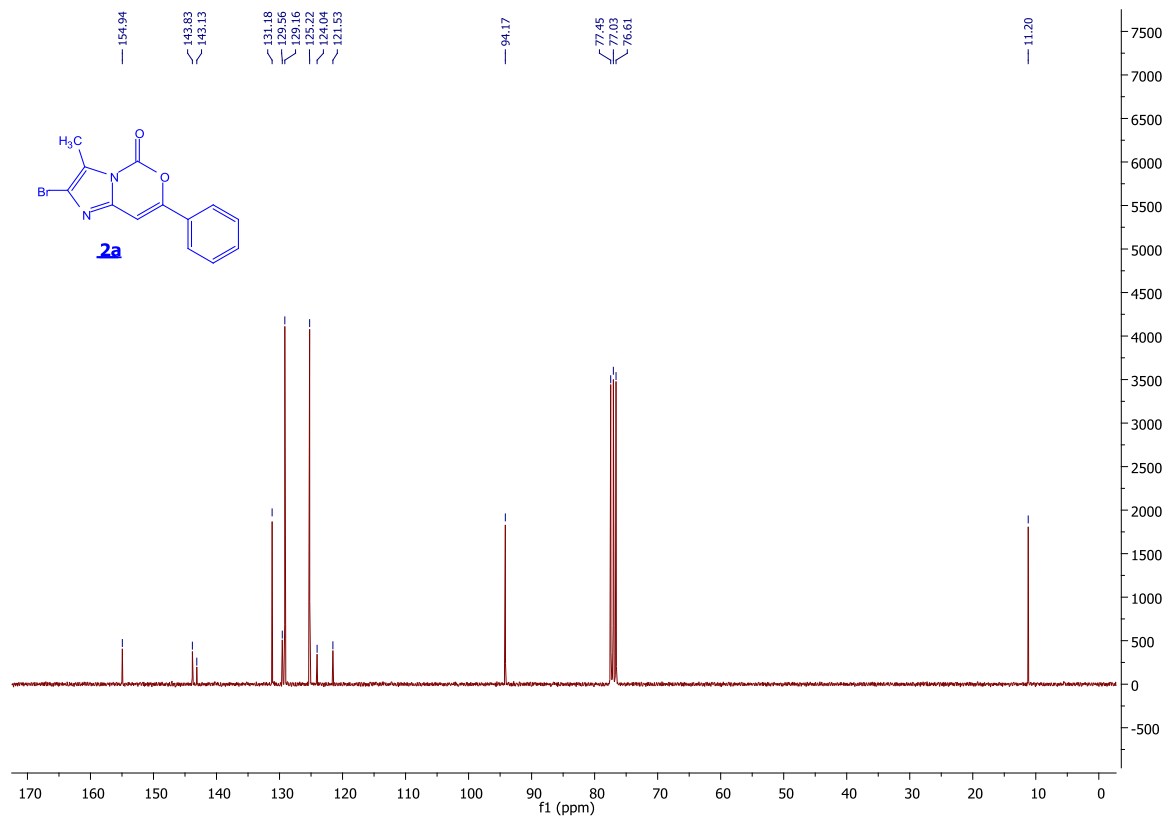

### $^1\text{H}$ NMR (300 MHz, $\text{CDCl}_3$ ) of **2b**

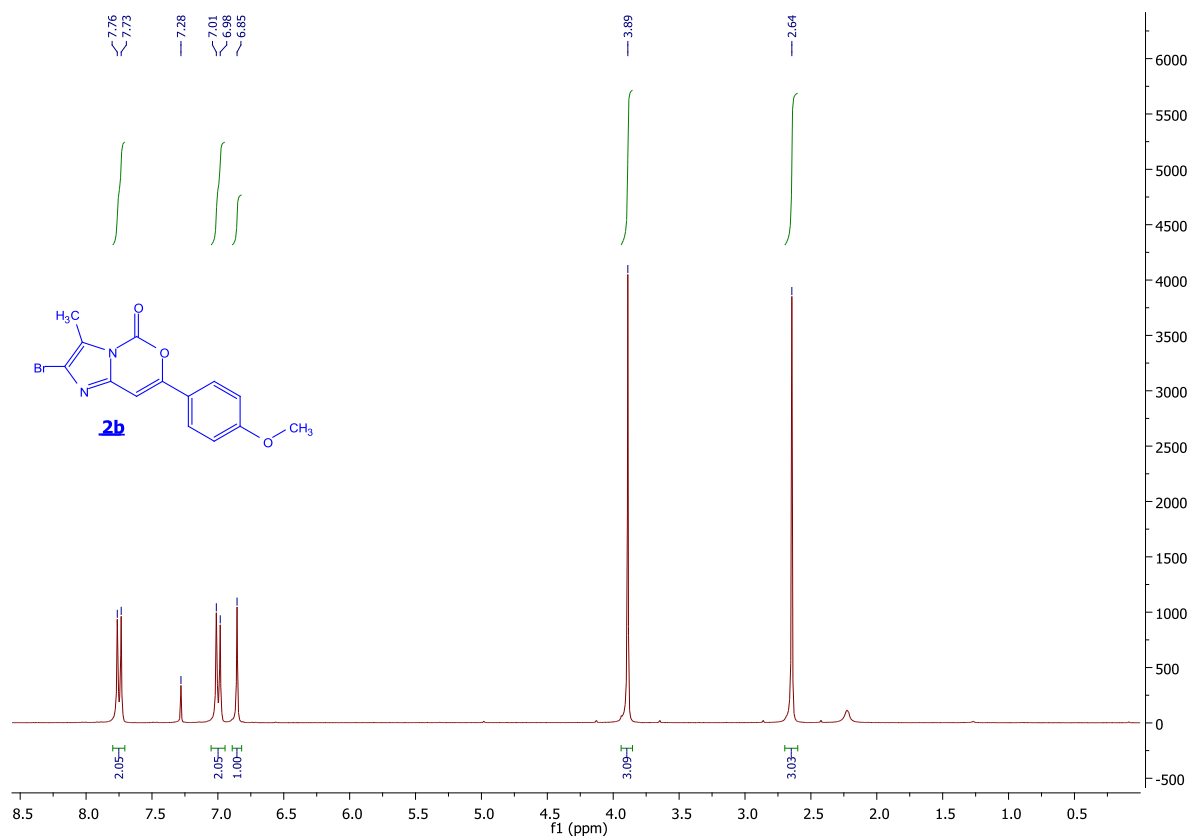

### $^{13}\text{C}$ NMR (75 MHz, $\text{CDCl}_3$ ) of **2b**

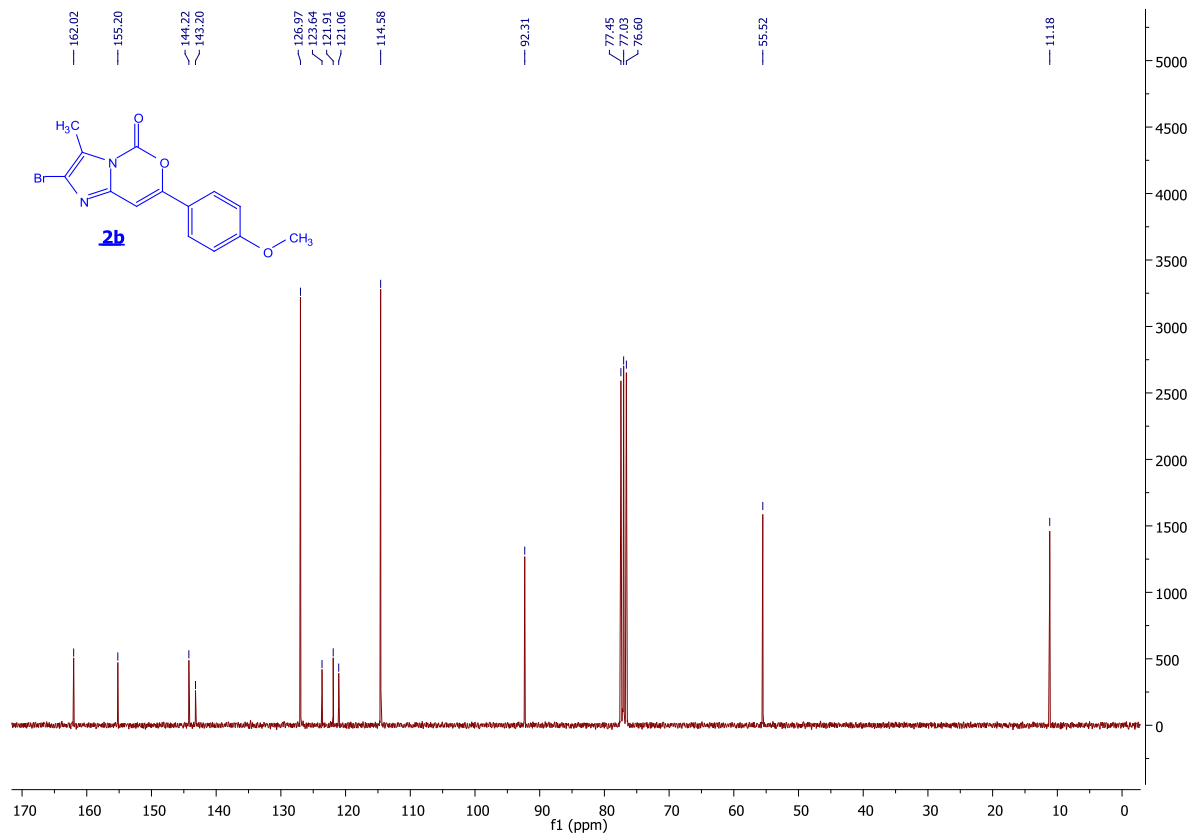

<sup>1</sup>H NMR (300 MHz, CDCl<sub>3</sub>) of **2c**

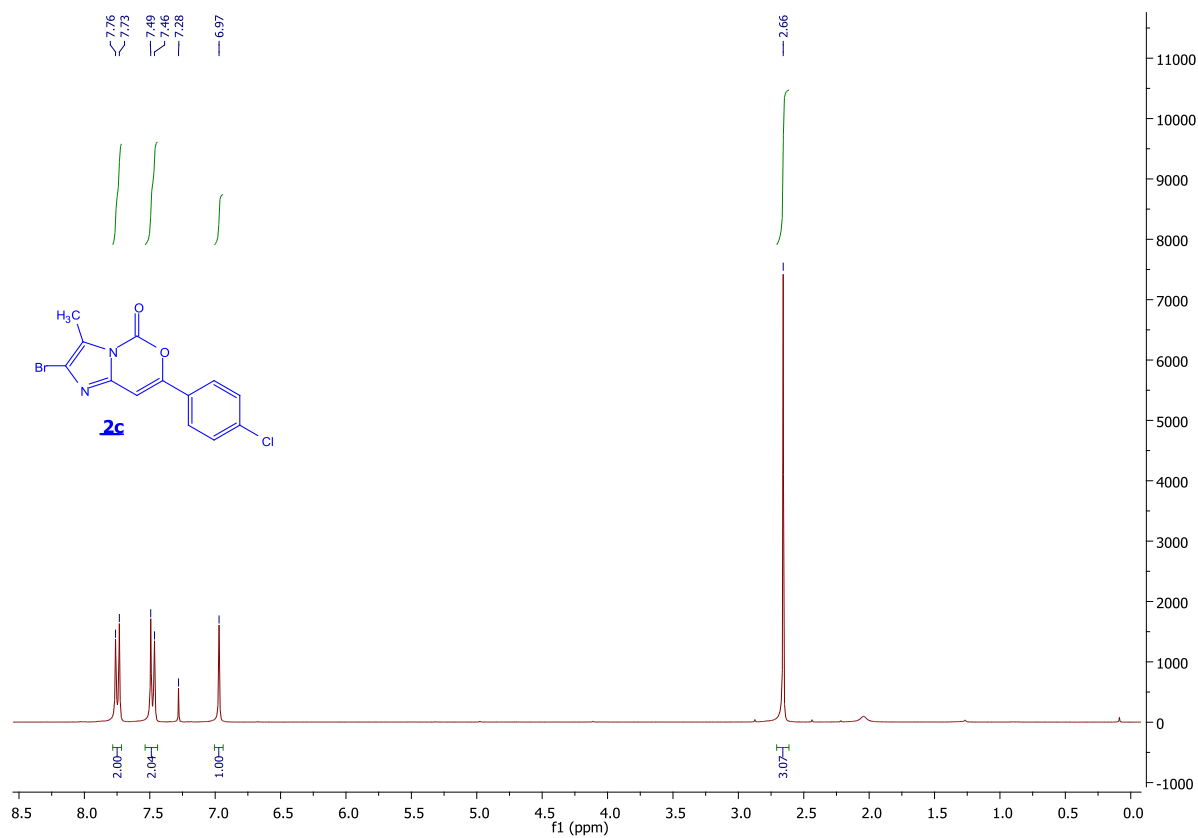

<sup>13</sup>C NMR (75 MHz, CDCl<sub>3</sub>) of **2c**

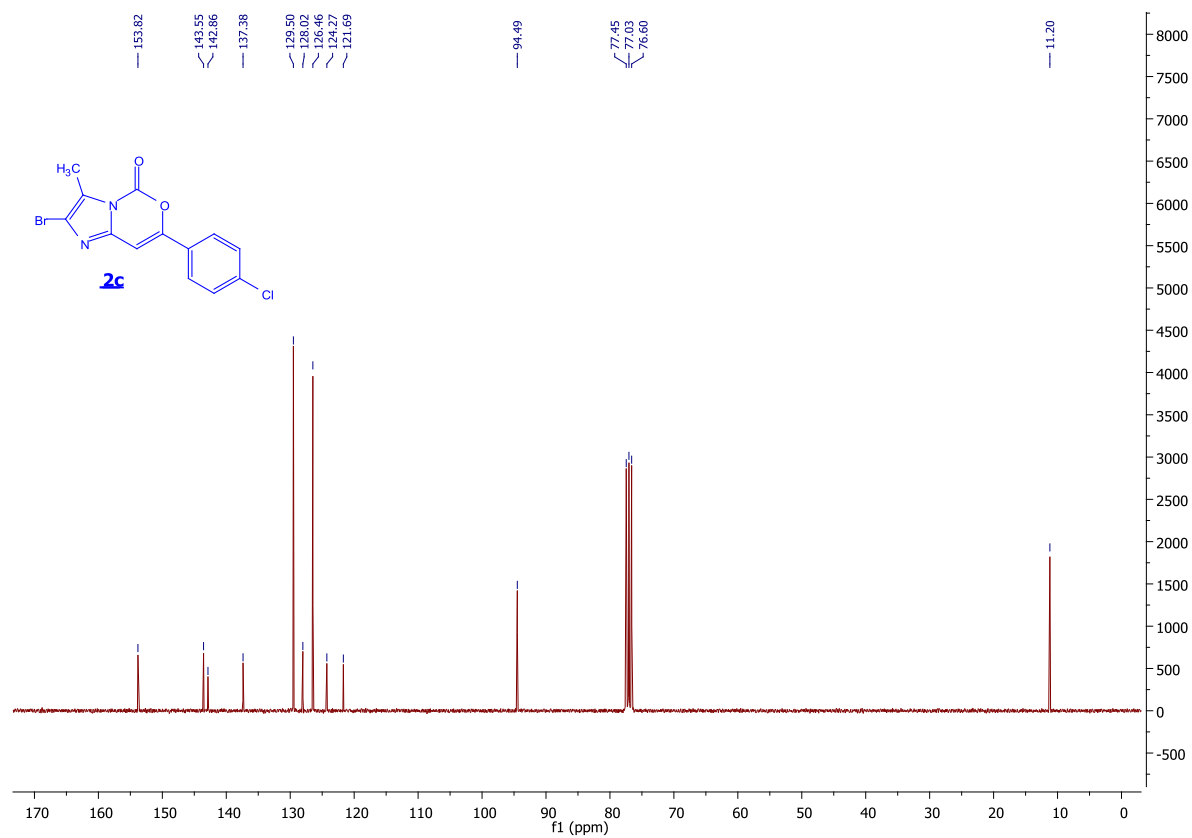

### $^1\text{H}$ NMR (300 MHz, $\text{CDCl}_3$ ) of **2d**

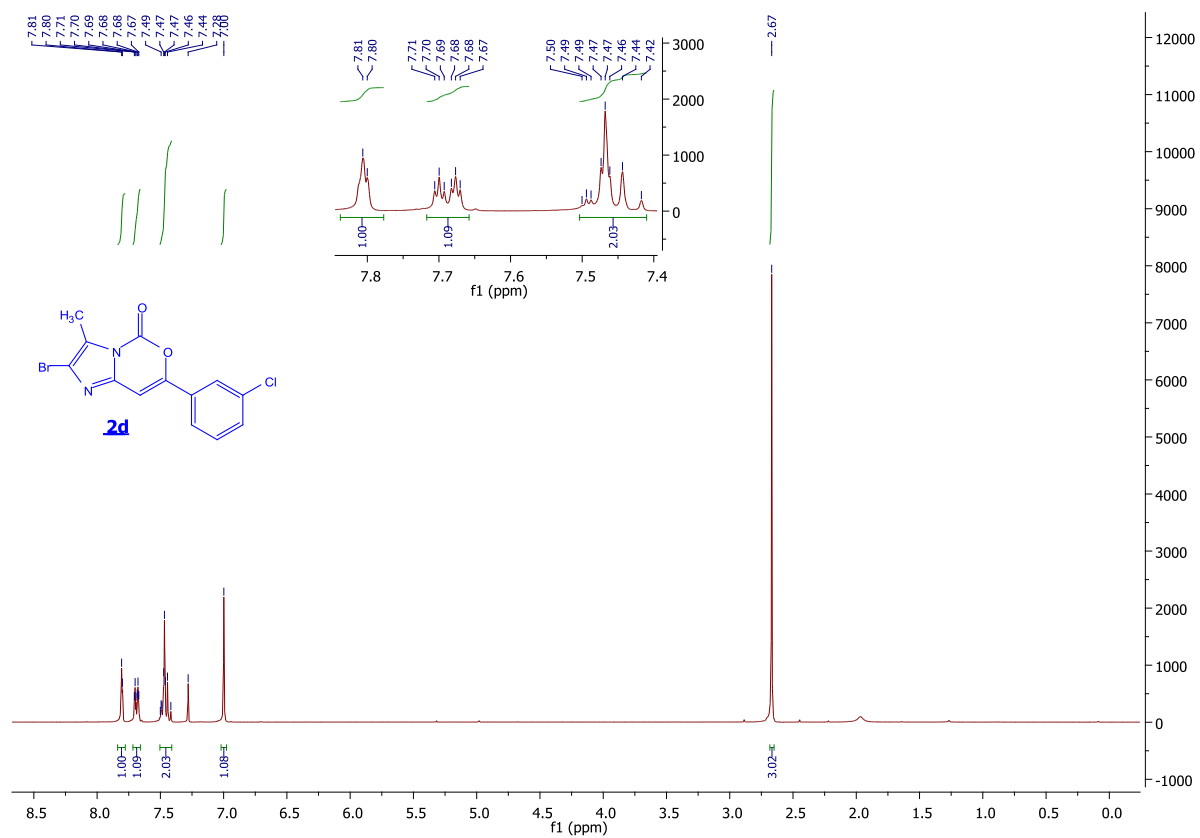

### $^{13}\text{C}$ NMR (75 MHz, $\text{CDCl}_3$ ) of **2d**

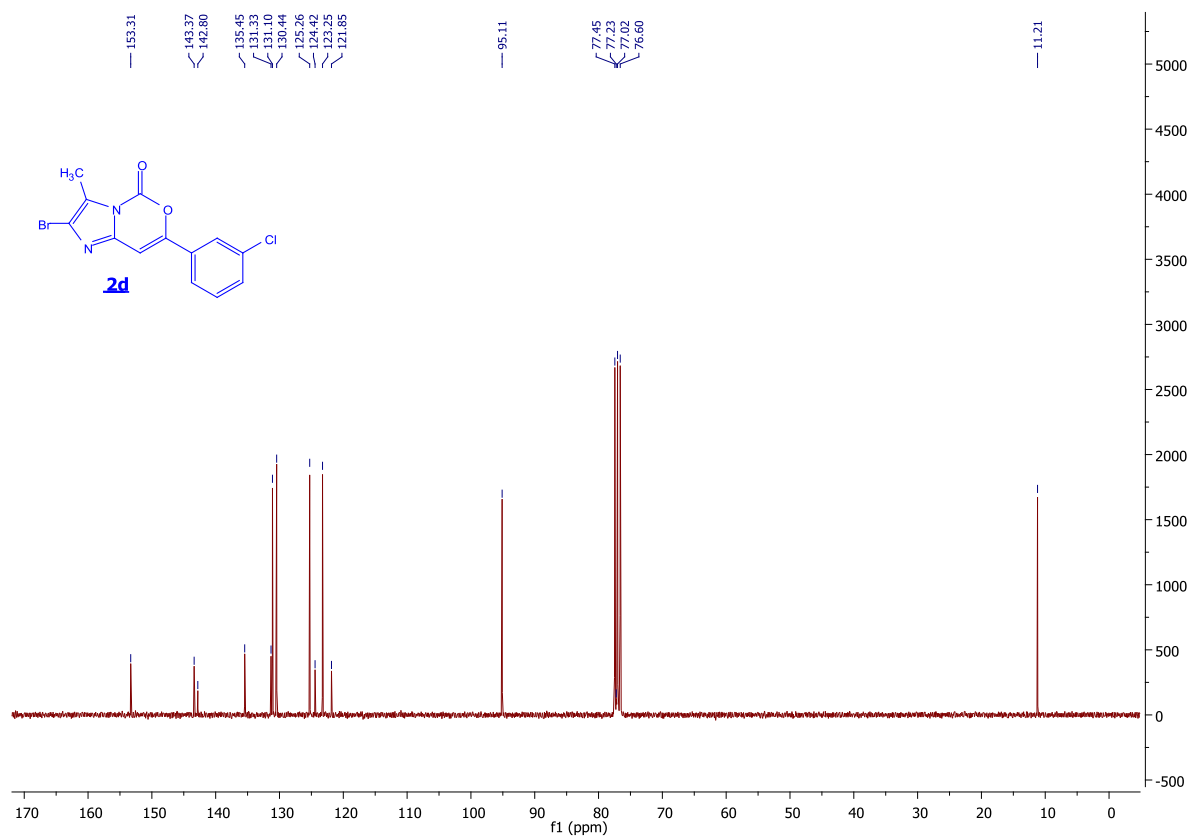

<sup>1</sup>H NMR (300 MHz, CDCl<sub>3</sub>) of **2e**

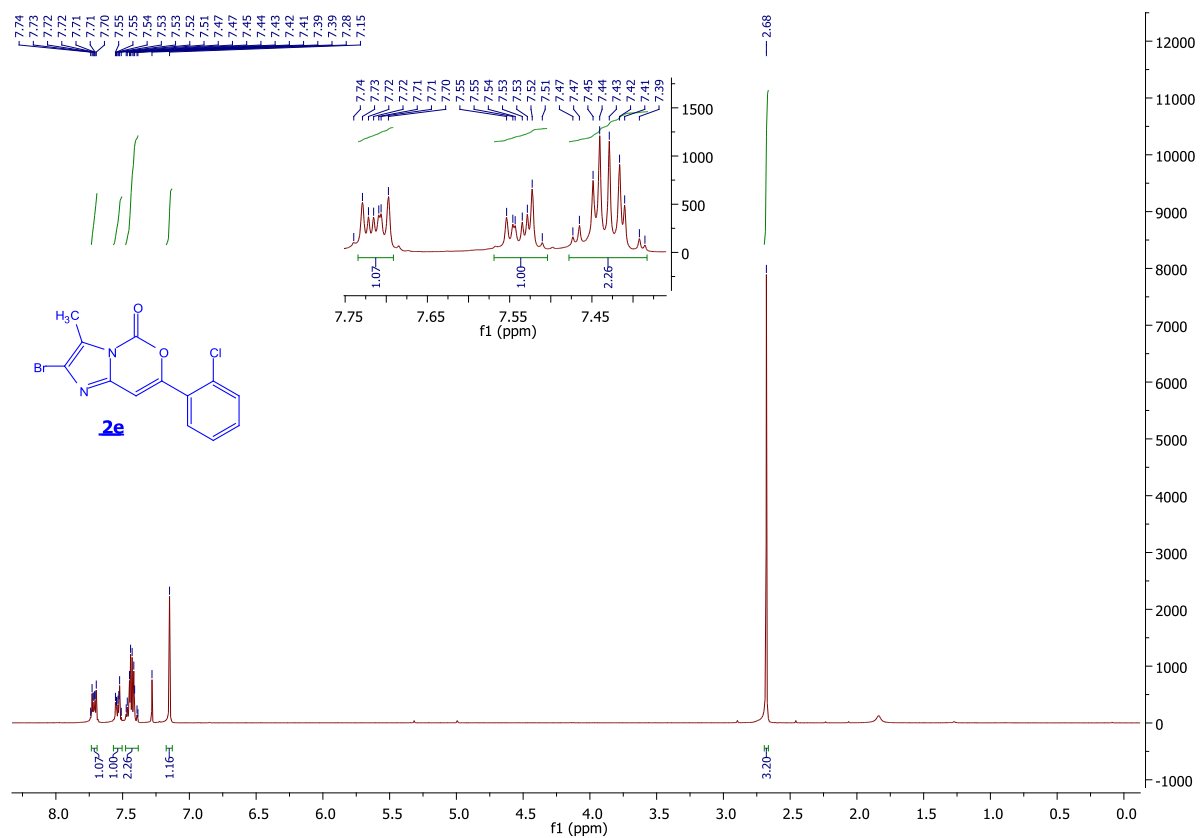

<sup>13</sup>C NMR (75 MHz, CDCl<sub>3</sub>) of **2e**

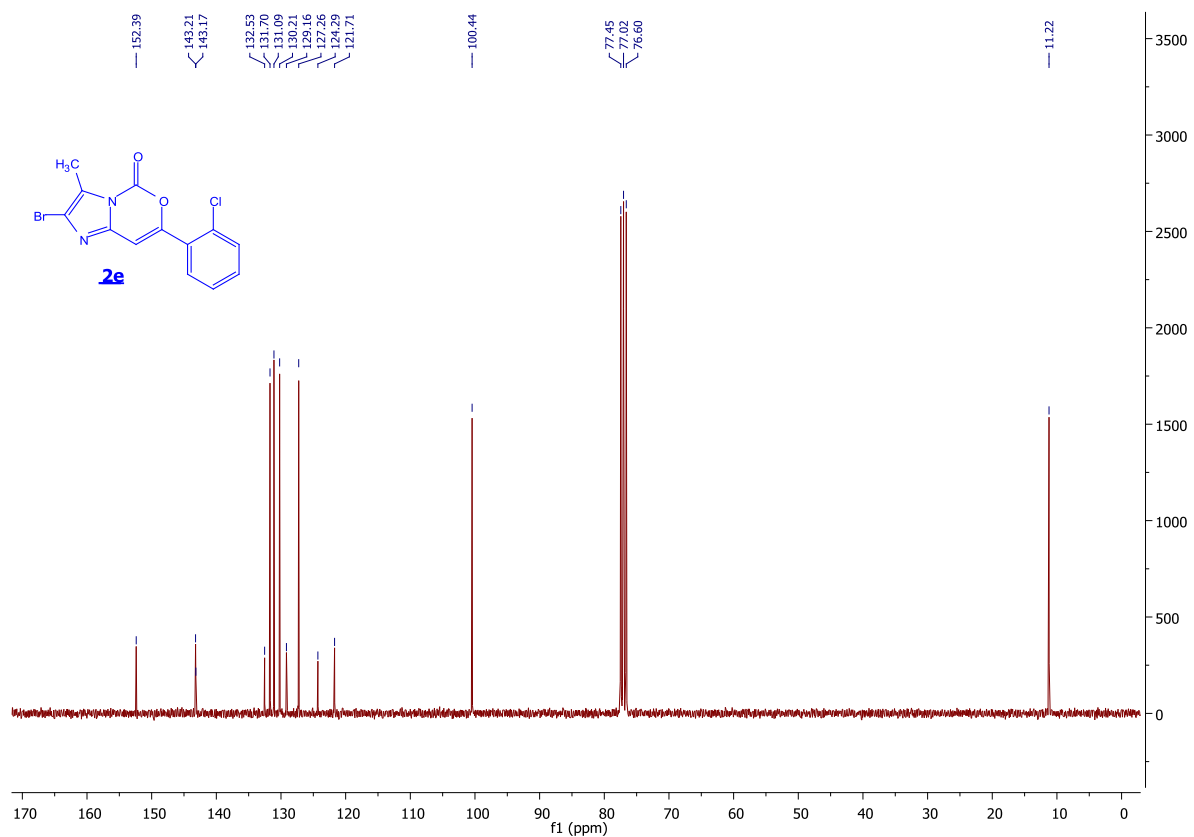

<sup>1</sup>H NMR (300 MHz, CDCl<sub>3</sub>) of **2f**

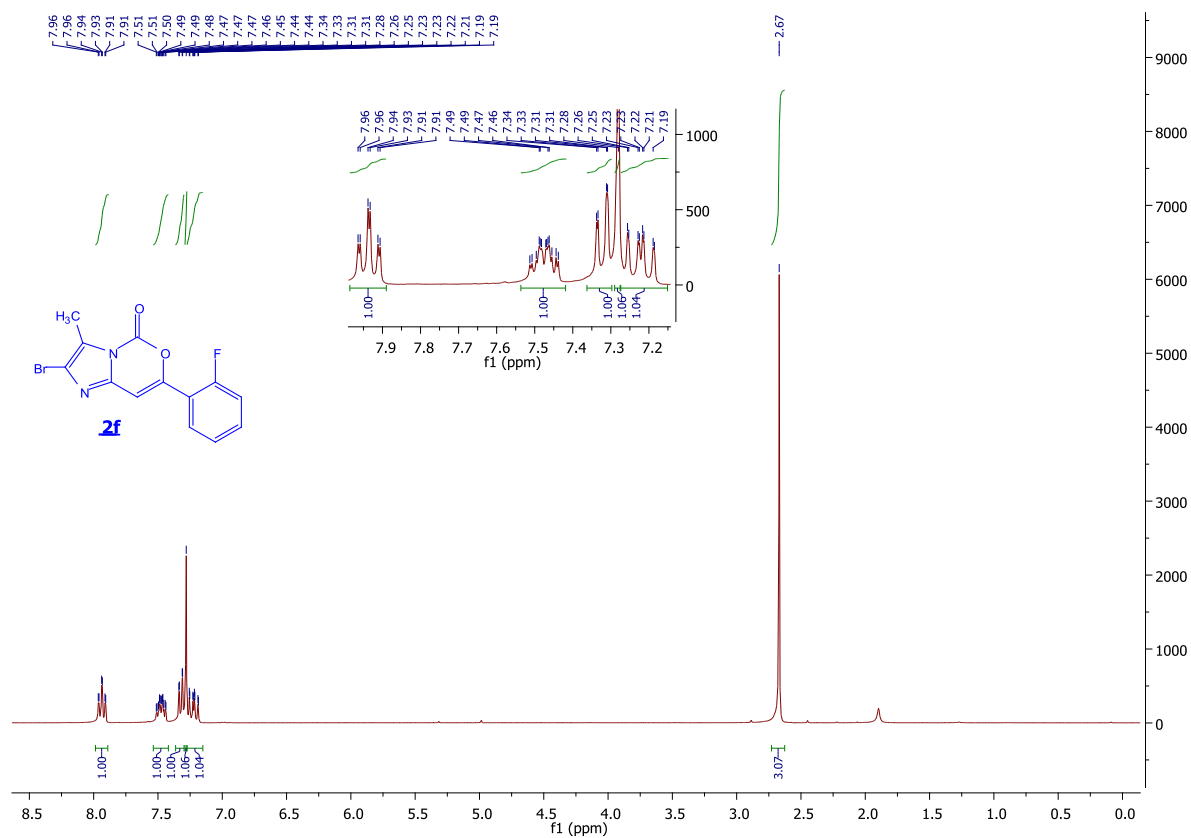

<sup>19</sup>F NMR (282 MHz, CDCl<sub>3</sub>) of **2f**

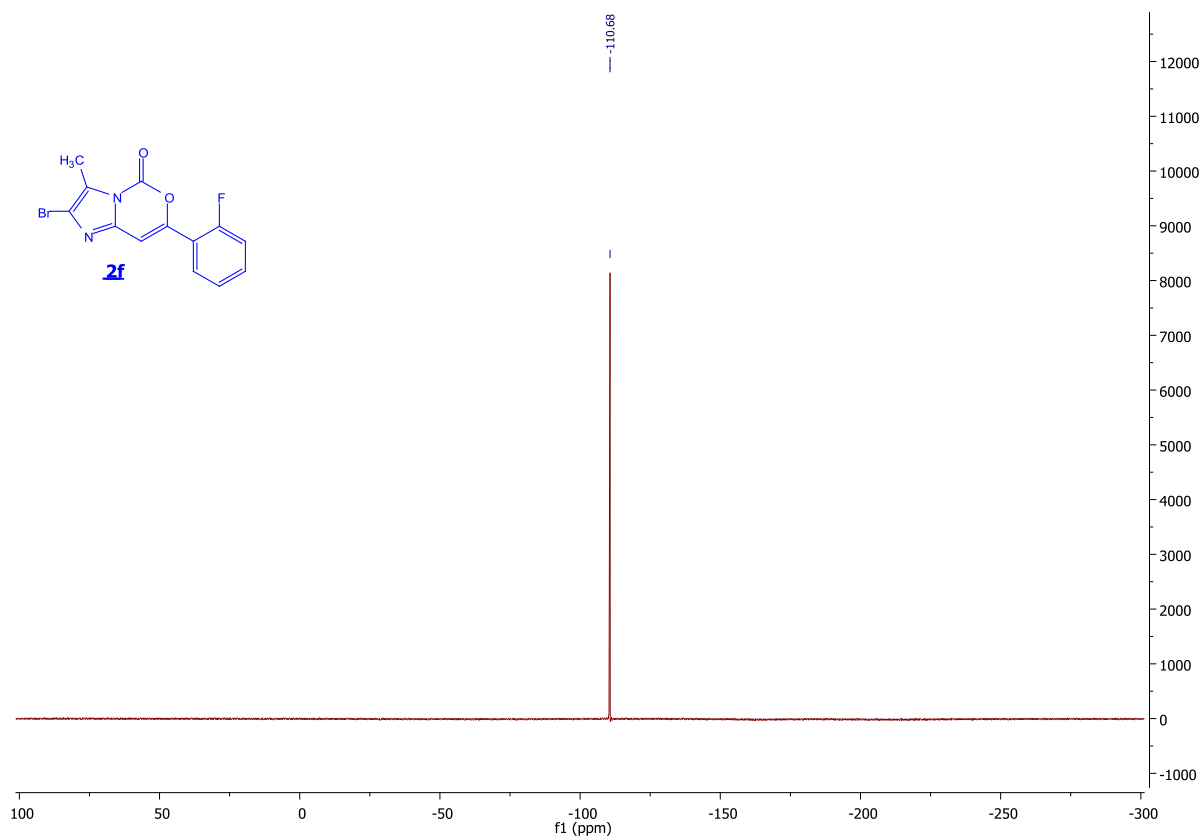



$^{13}\text{C}$  NMR (75 MHz,  $\text{CDCl}_3$ ) of **2f**

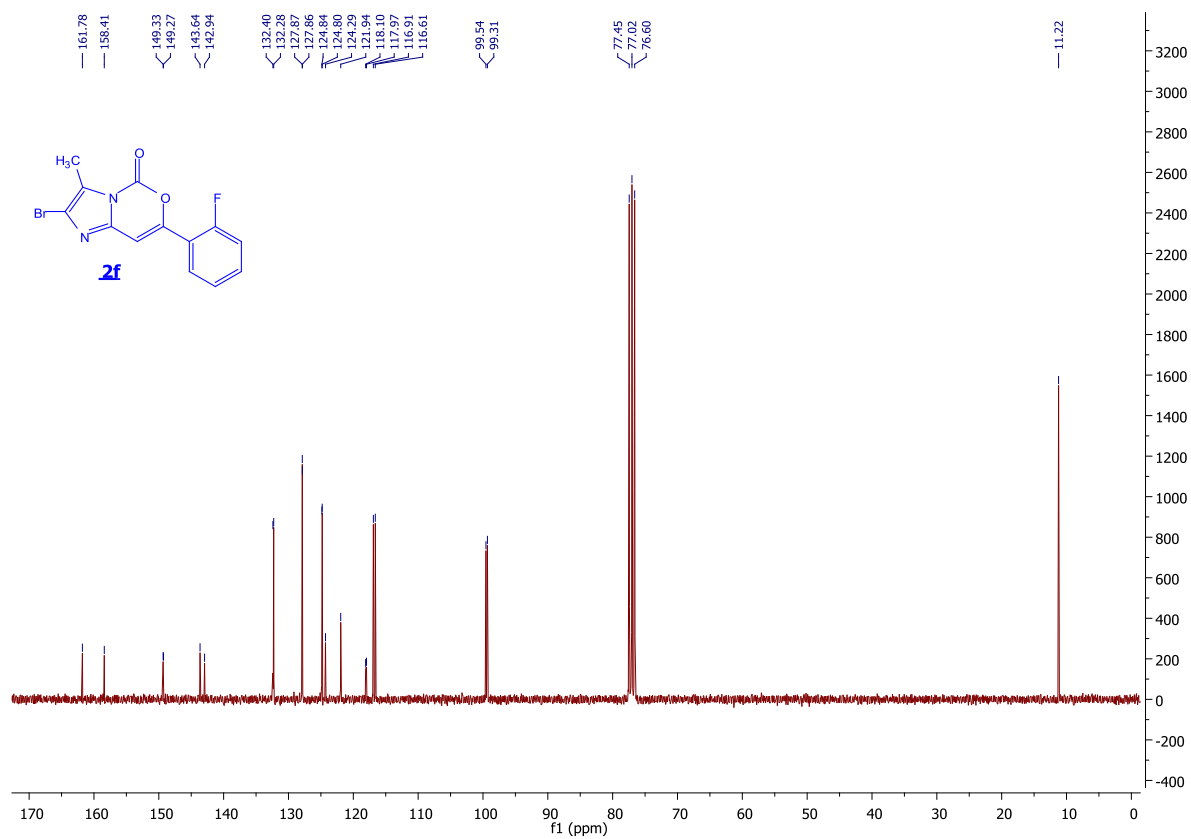

$^1\text{H}$  NMR (300 MHz,  $\text{CDCl}_3$ ) of **2g**

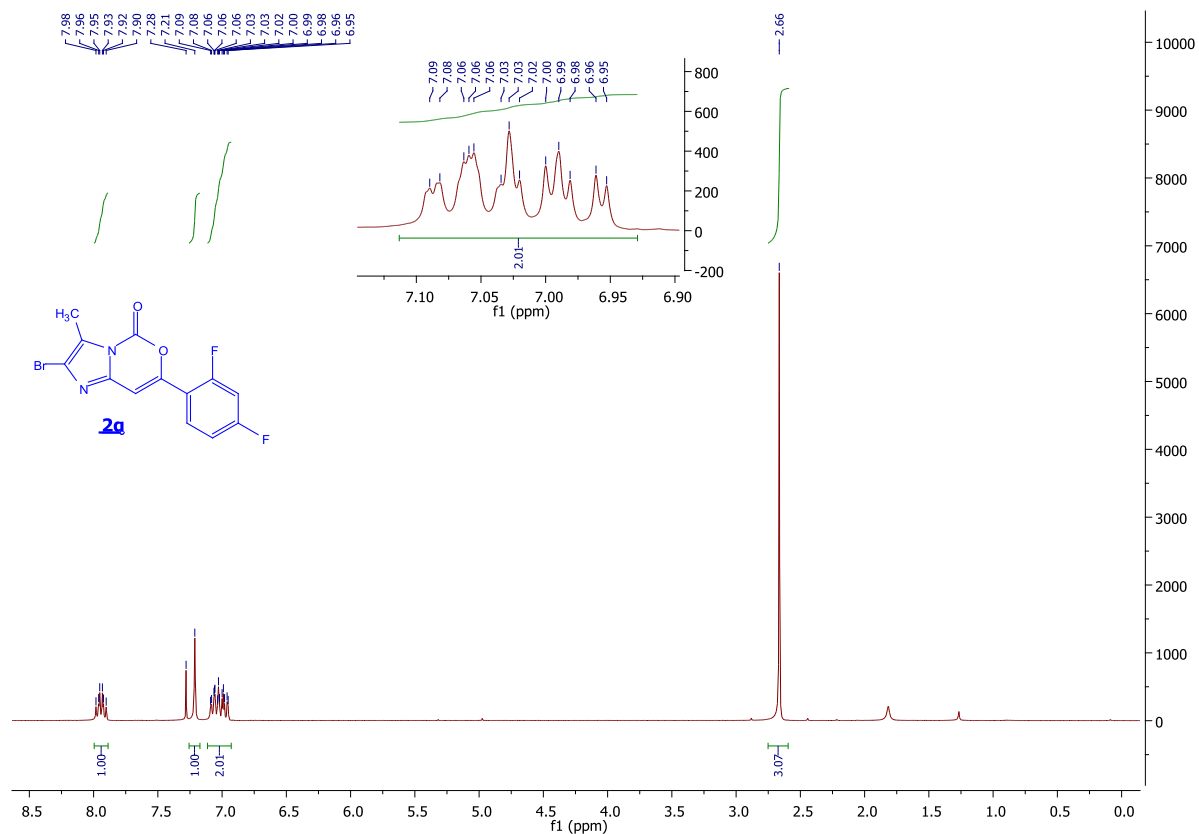

$^{19}\text{F}$  NMR (282 MHz,  $\text{CDCl}_3$ ) of **2g**

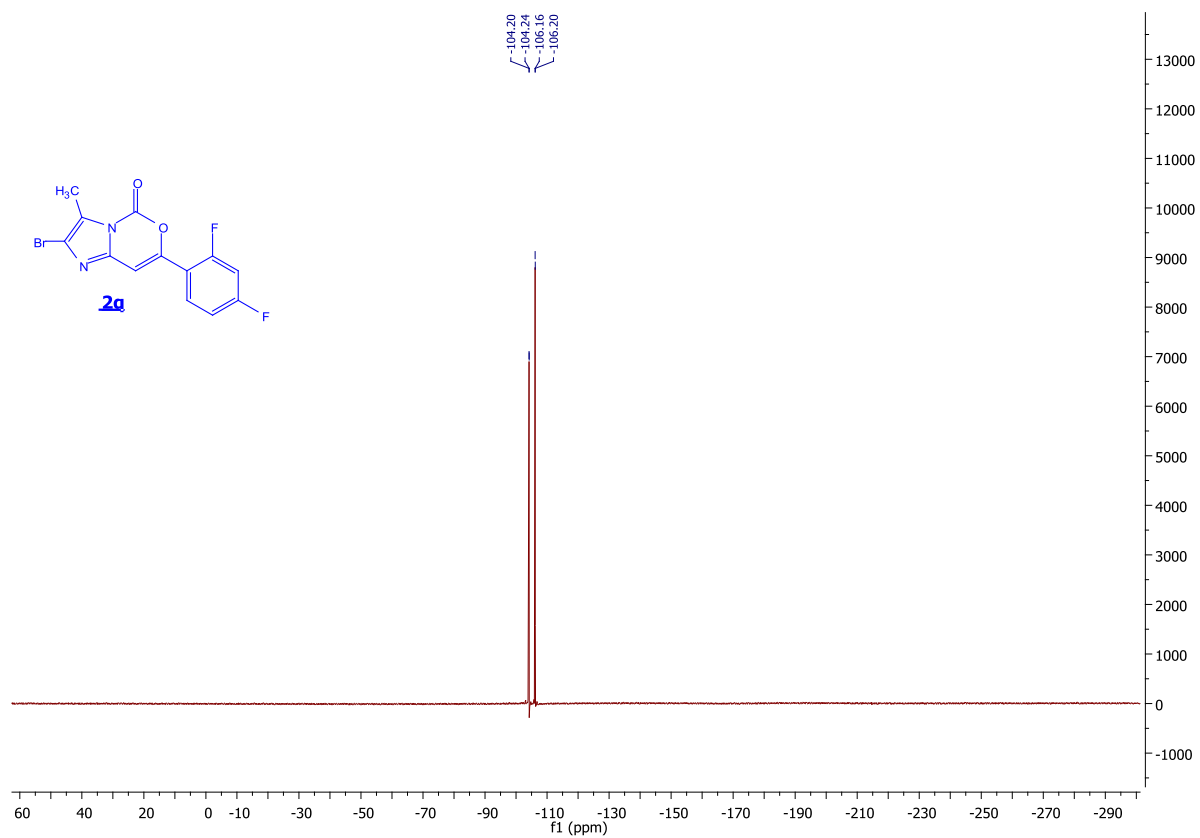

$^{13}\text{C}$  NMR (75 MHz,  $\text{CDCl}_3$ ) of **2g**

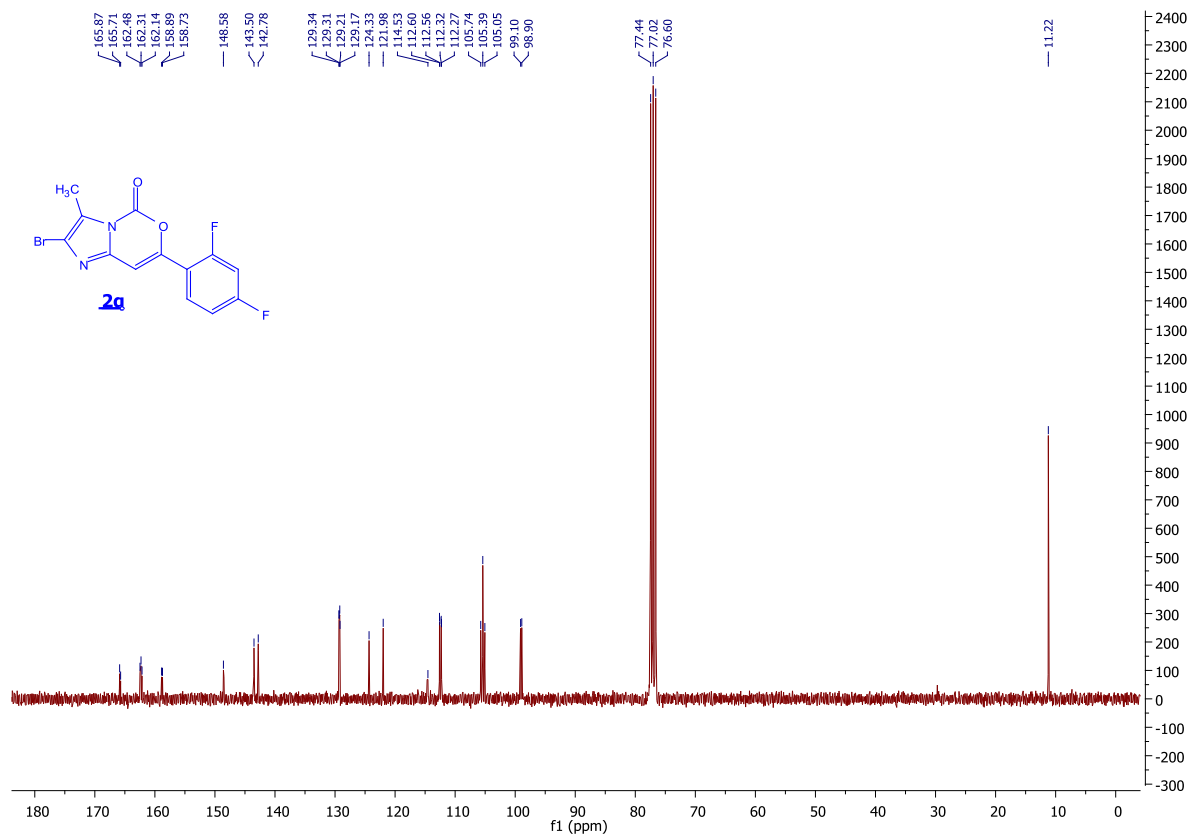

### $^1\text{H}$ NMR (300 MHz, $\text{CDCl}_3$ ) of **2h**

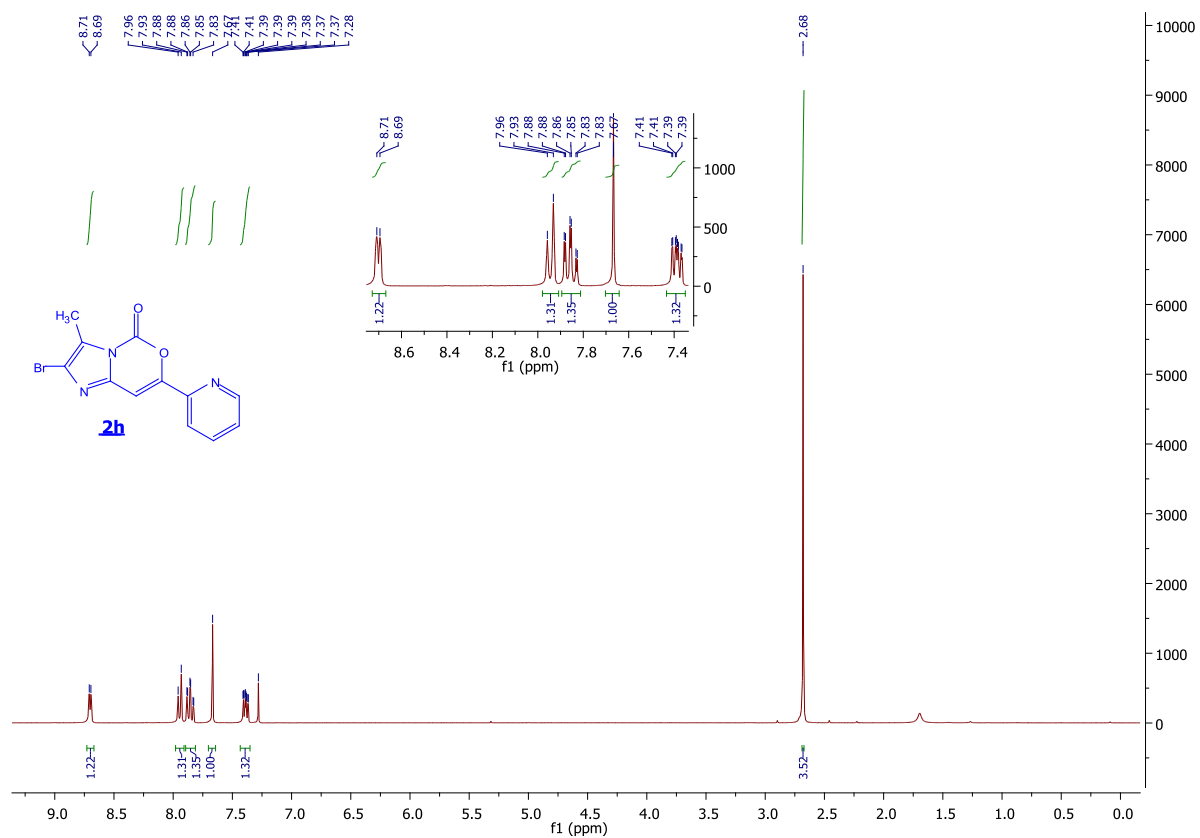

### $^{13}\text{C}$ NMR (75 MHz, $\text{CDCl}_3$ ) of **2h**

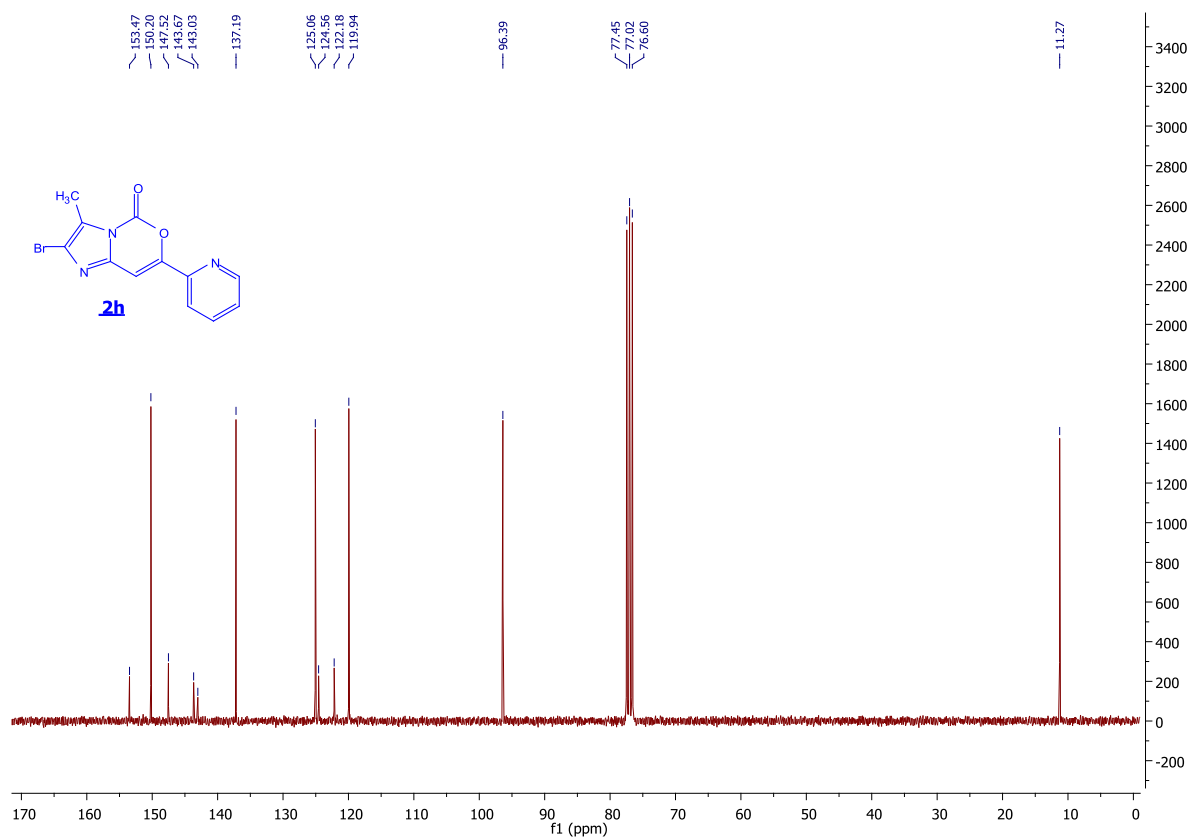

### $^1\text{H}$ NMR (300 MHz, $\text{CDCl}_3$ ) of **2i**

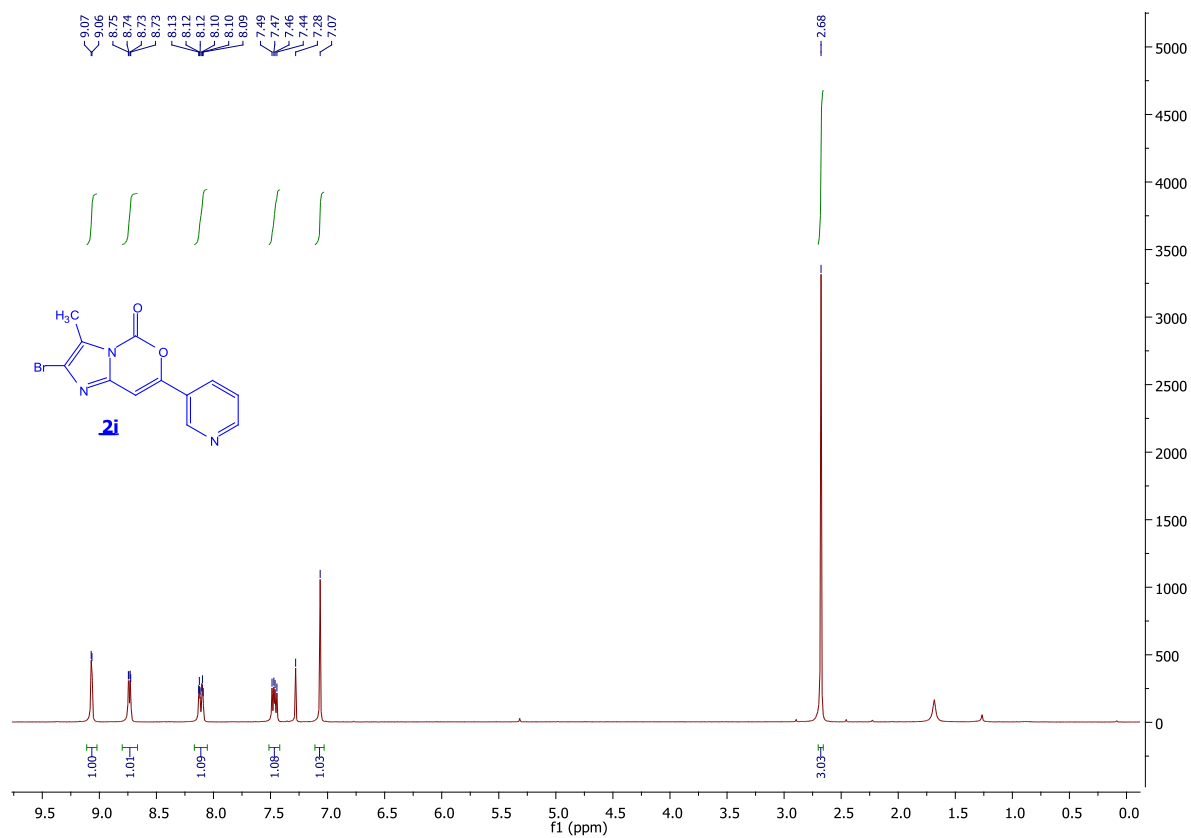

### $^{13}\text{C}$ NMR (75 MHz, $\text{CDCl}_3$ ) of **2i**

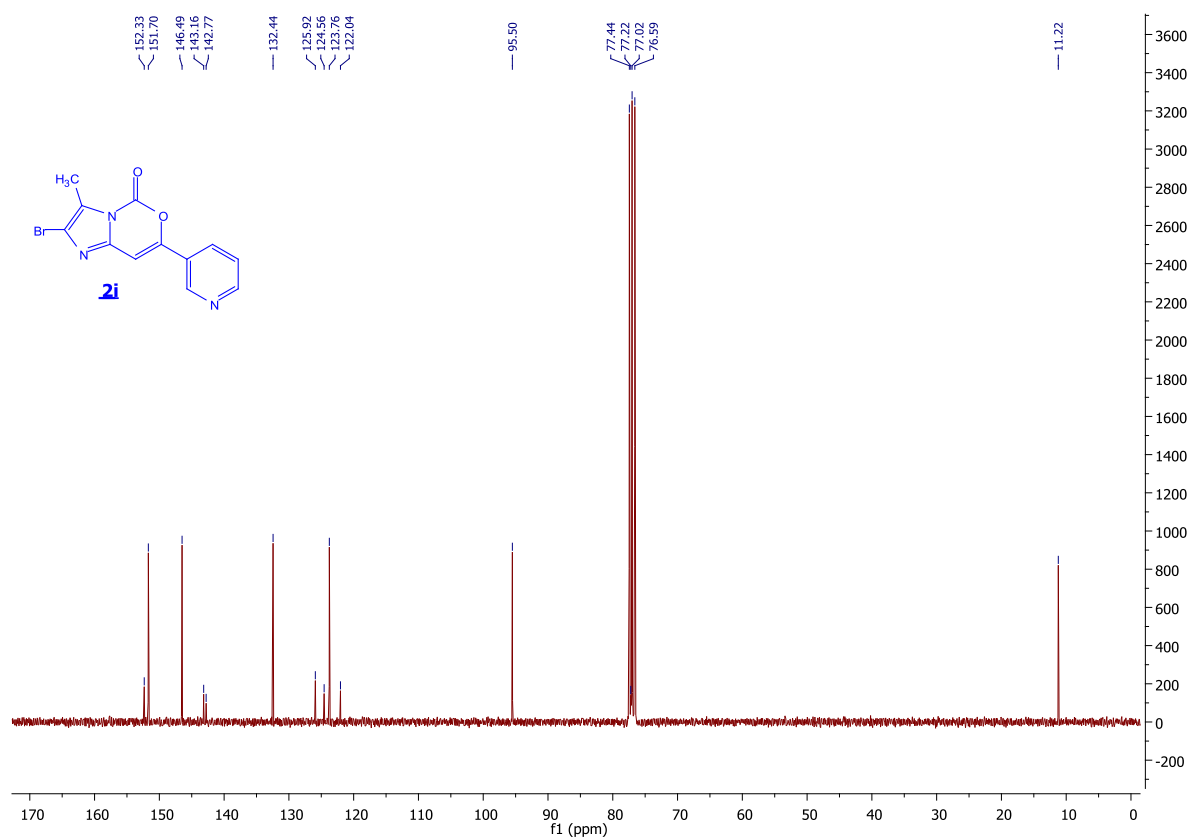

### $^1\text{H}$ NMR (300 MHz, $\text{CDCl}_3$ ) of **2j**

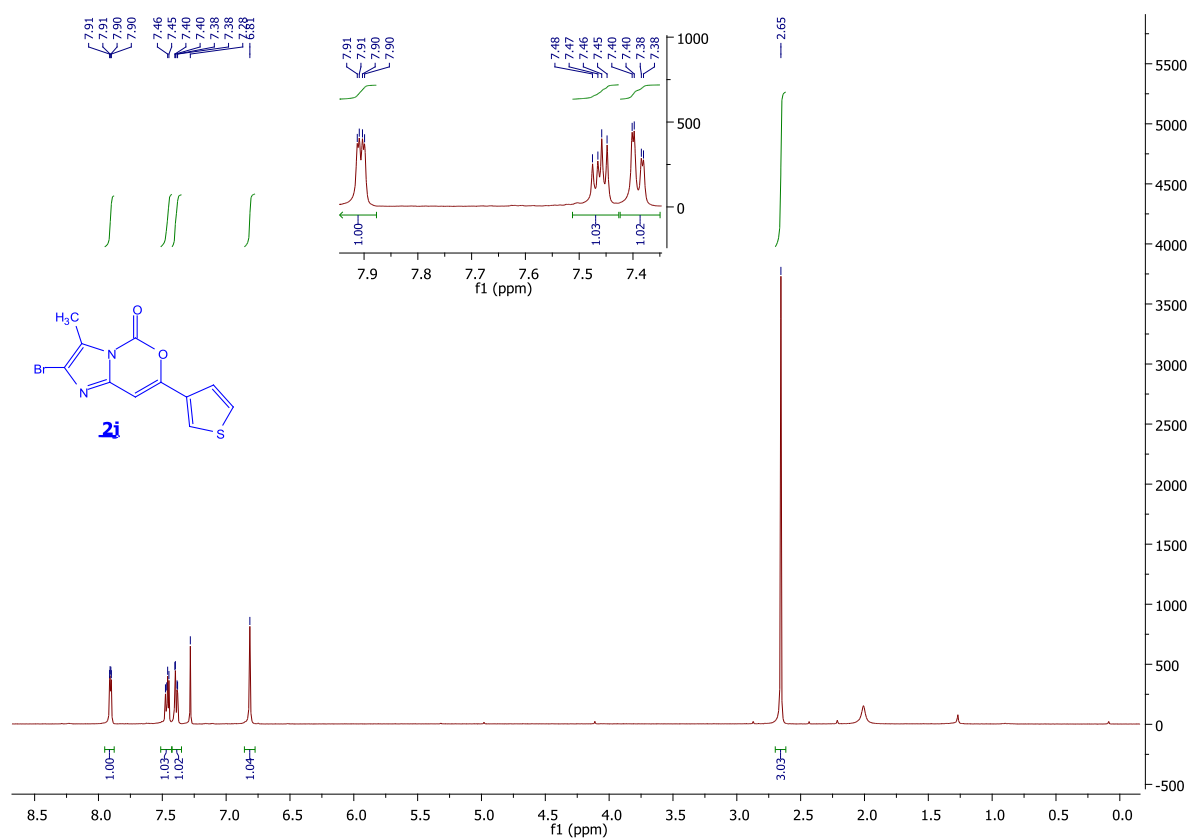

### $^{13}\text{C}$ NMR (75 MHz, $\text{CDCl}_3$ ) of **2j**

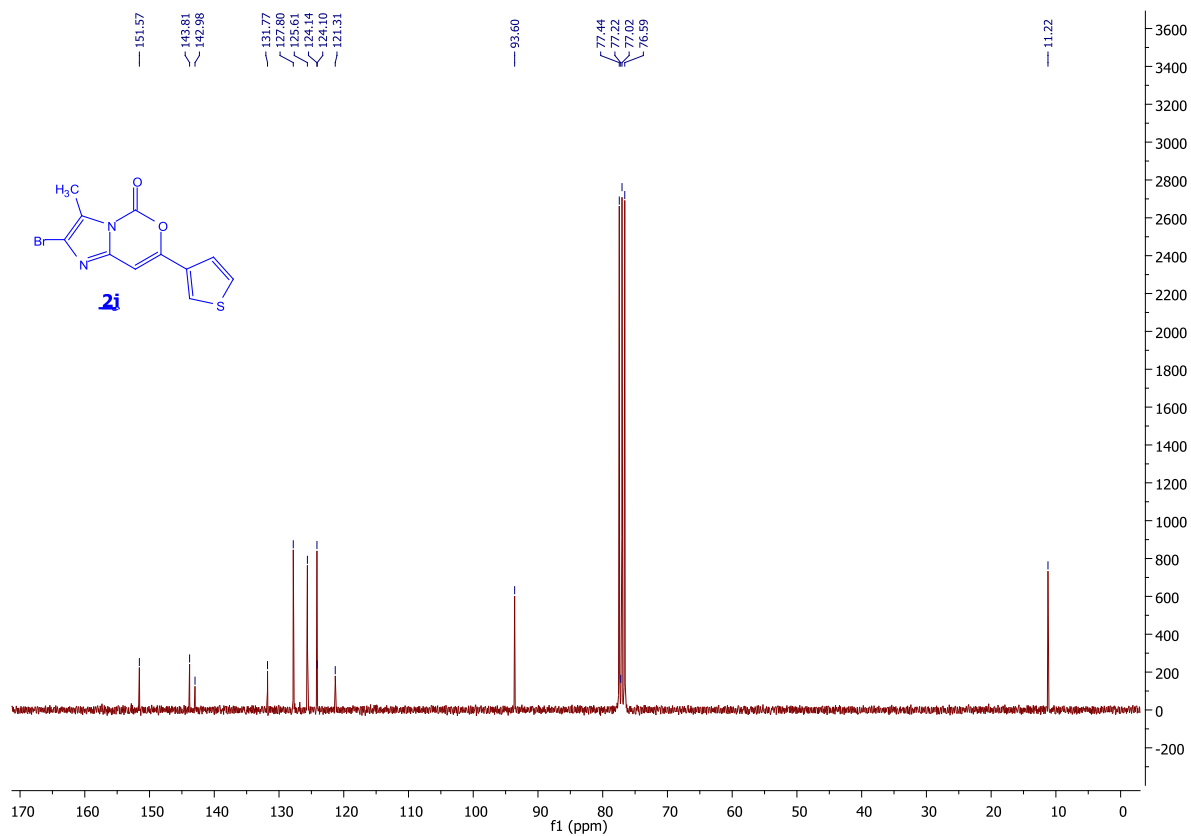

<sup>1</sup>H NMR (300 MHz, CDCl<sub>3</sub>) of **2k**

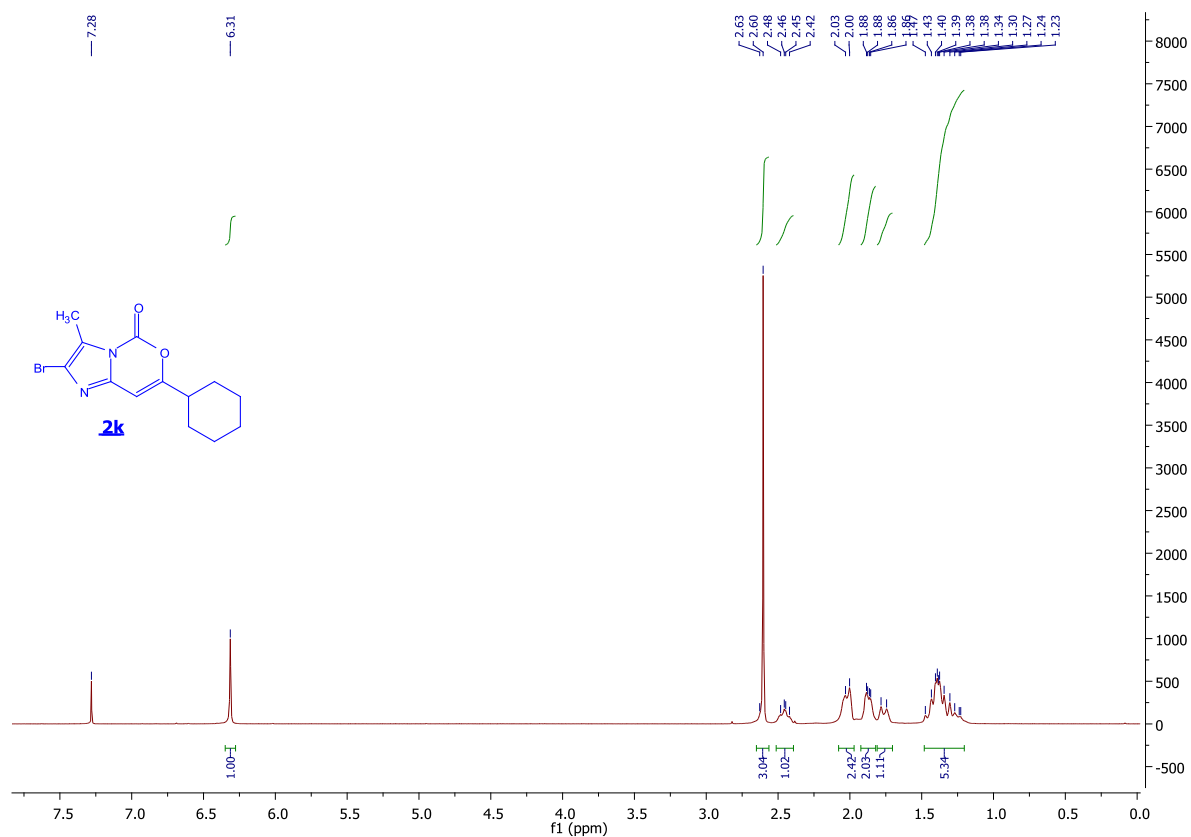

<sup>13</sup>C NMR (75 MHz, CDCl<sub>3</sub>) of **2k**

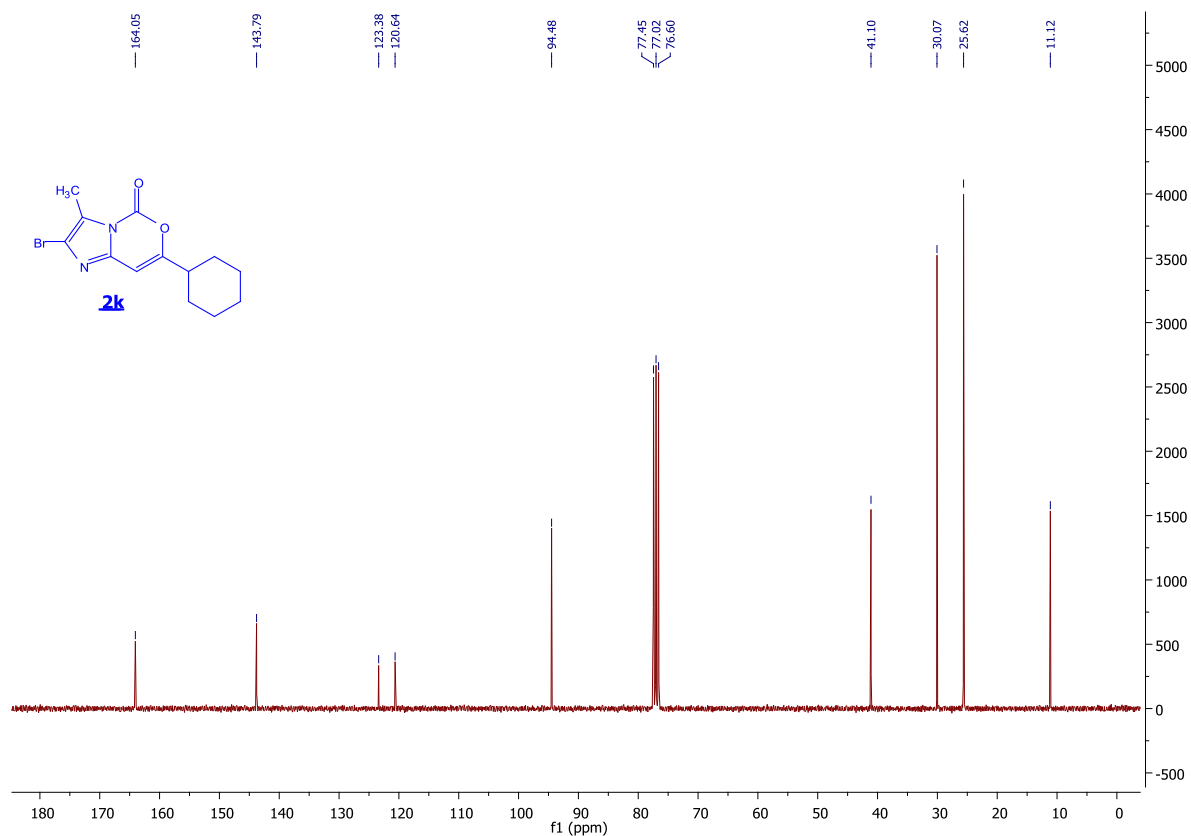

# <sup>1</sup>H NMR (300 MHz, CDCl<sub>3</sub>) of **2I**

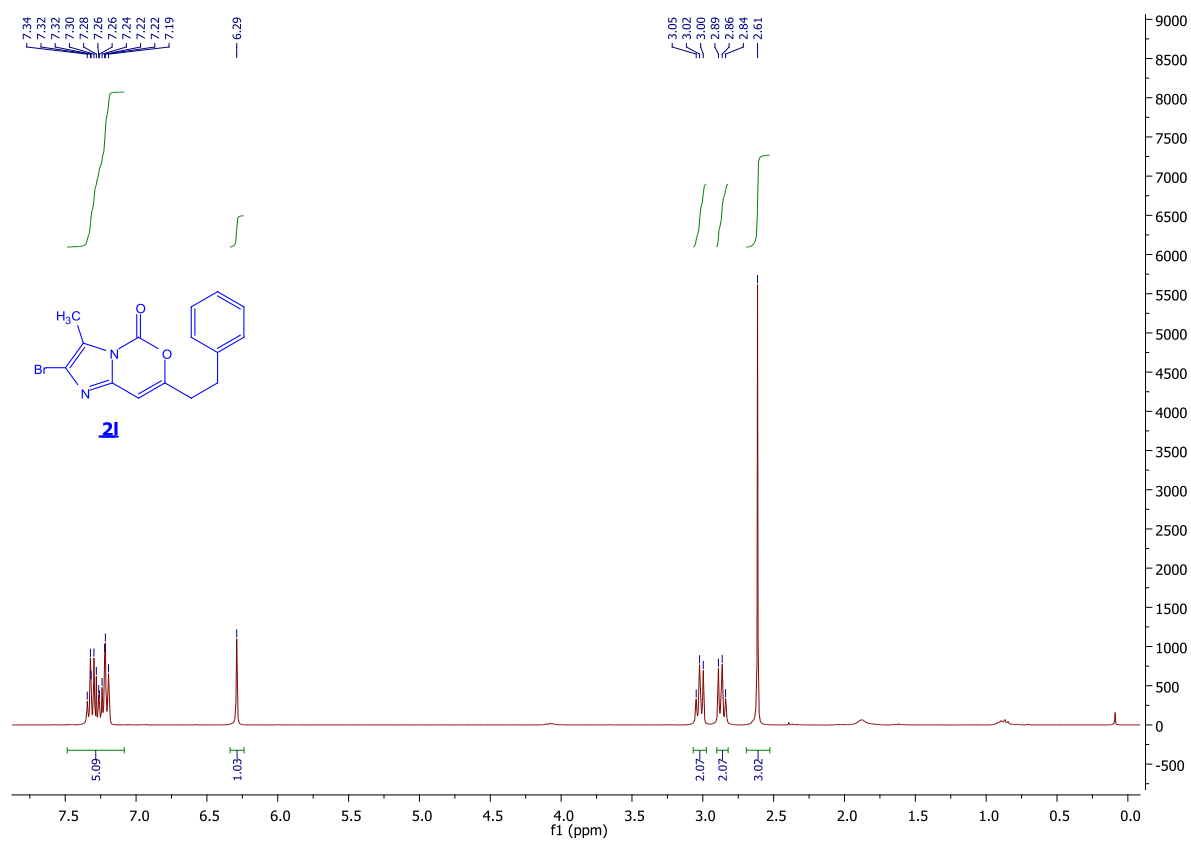

# <sup>13</sup>C NMR (75 MHz, CDCl<sub>3</sub>) of **2I**

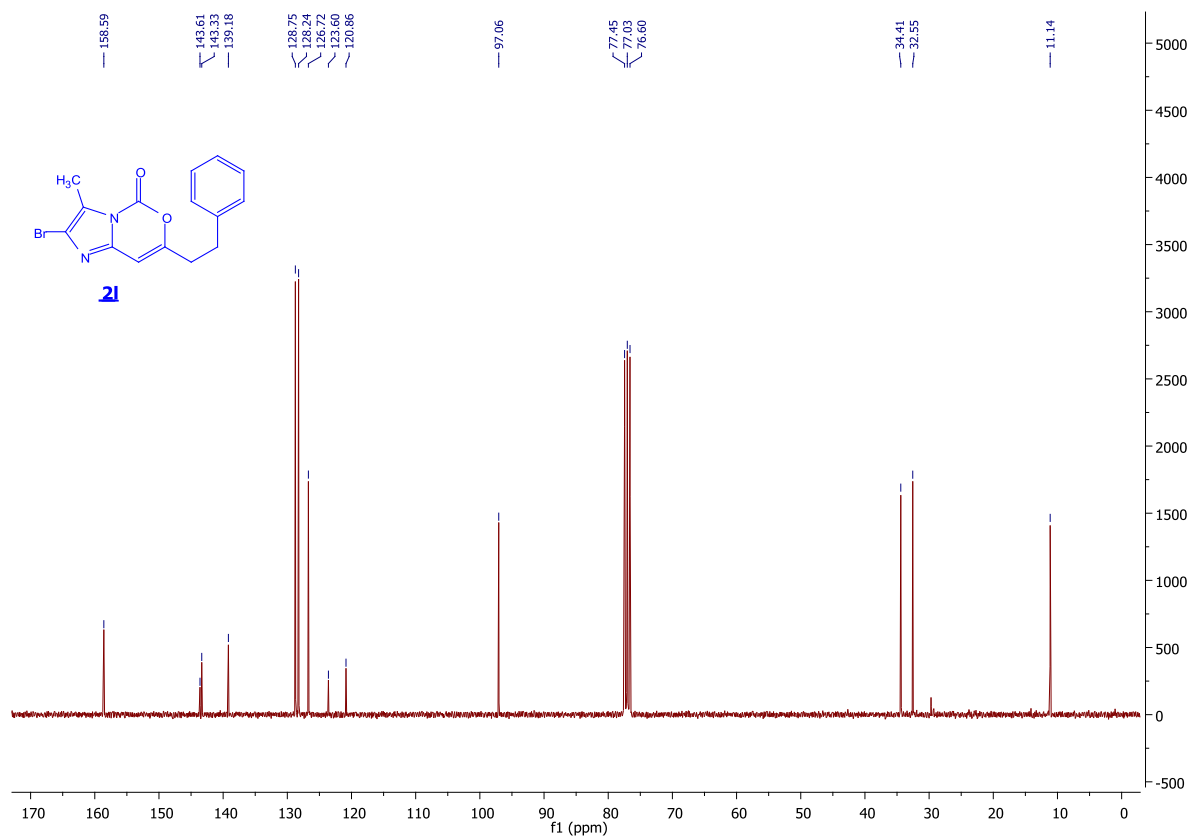

<sup>1</sup>H NMR (300 MHz, CDCl<sub>3</sub>) of **5a**

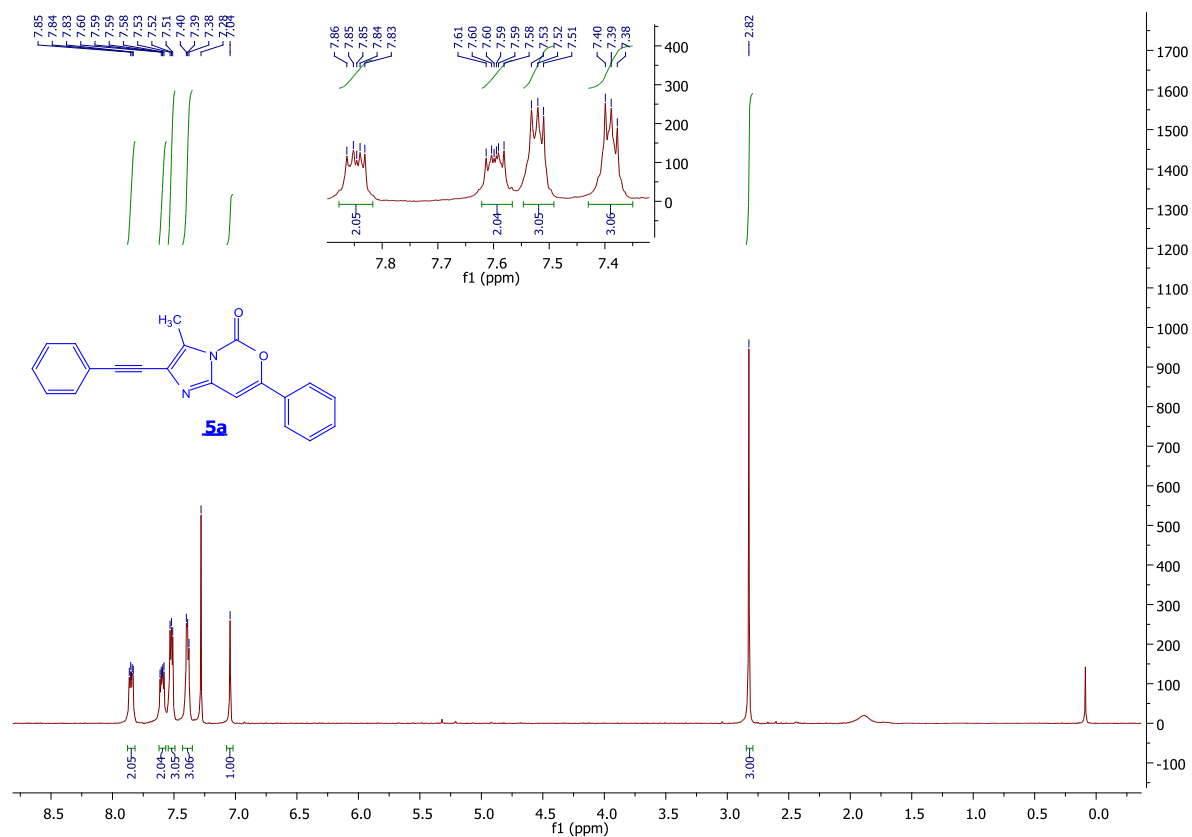

<sup>13</sup>C NMR (75 MHz, CDCl<sub>3</sub>) of **5a**

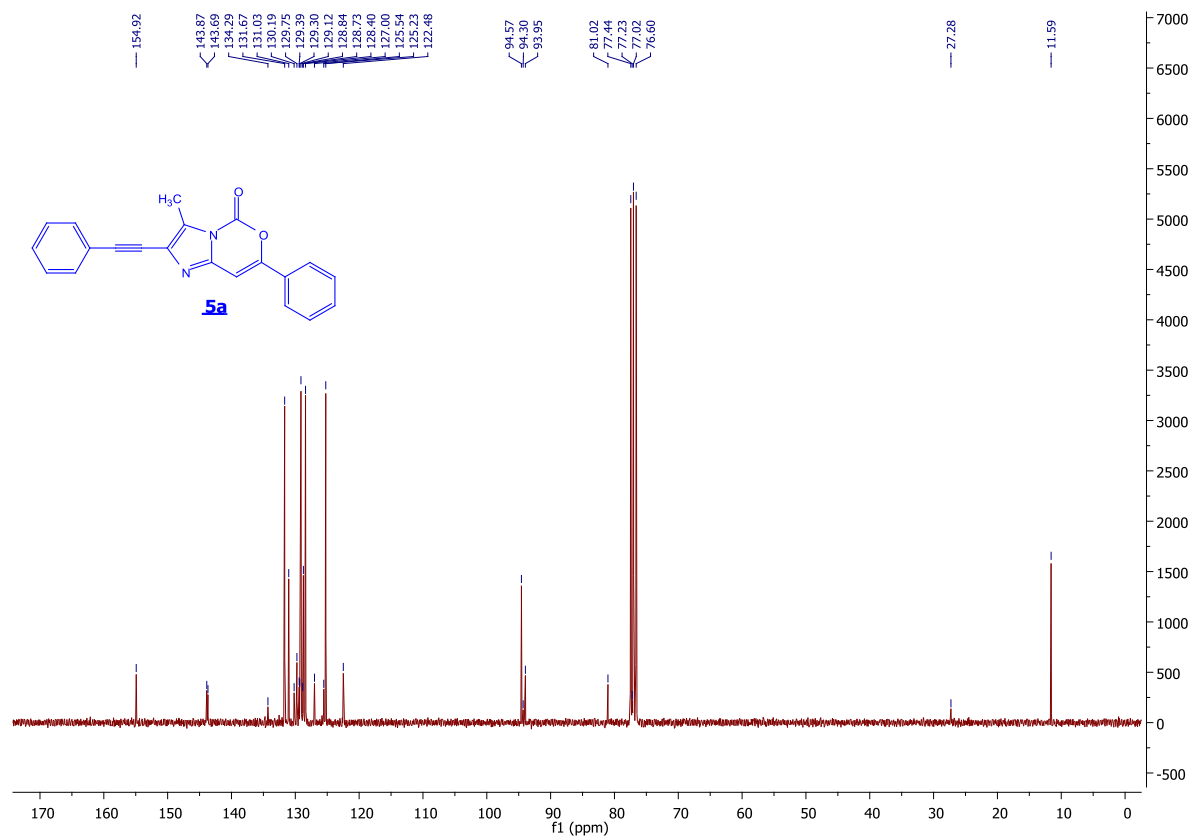



$^1\text{H}$  NMR (300 MHz,  $\text{CDCl}_3$ ) of **5b**

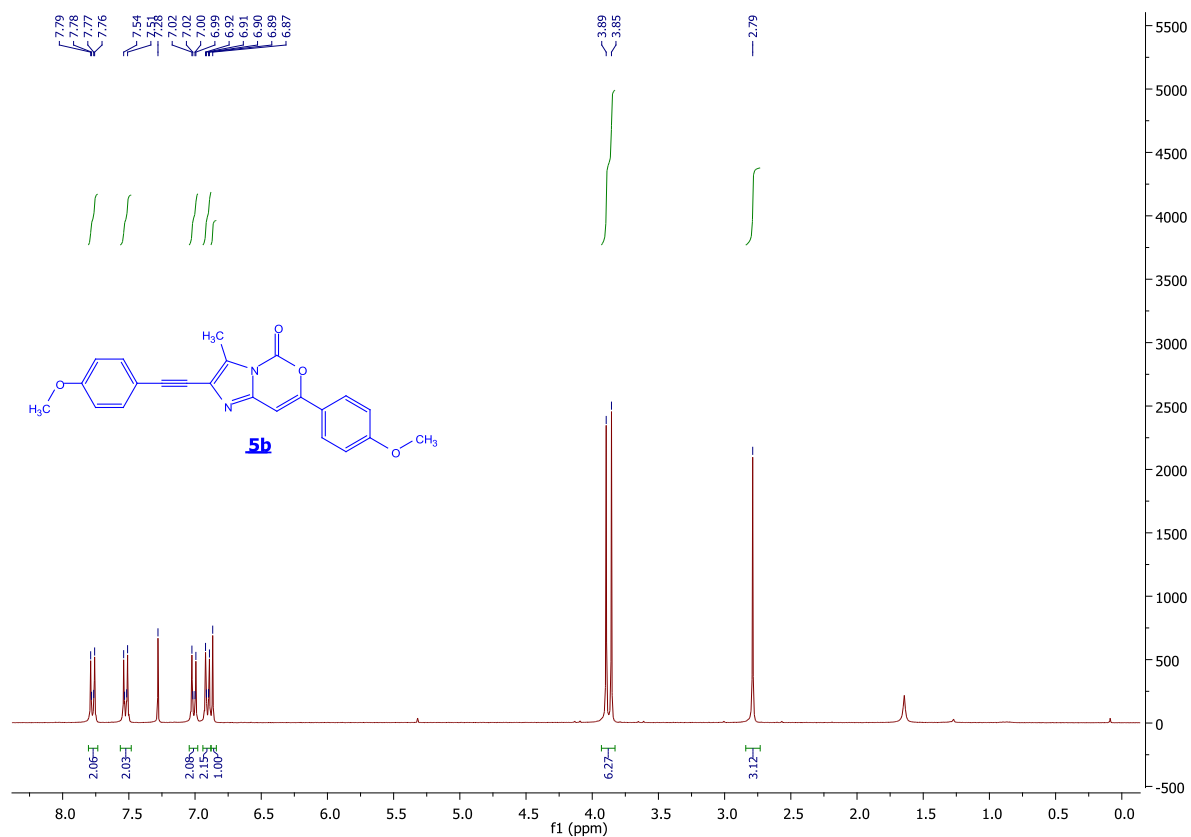

$^{13}\text{C}$  NMR (75 MHz,  $\text{DMSO}-d_6$ ) of **5b**

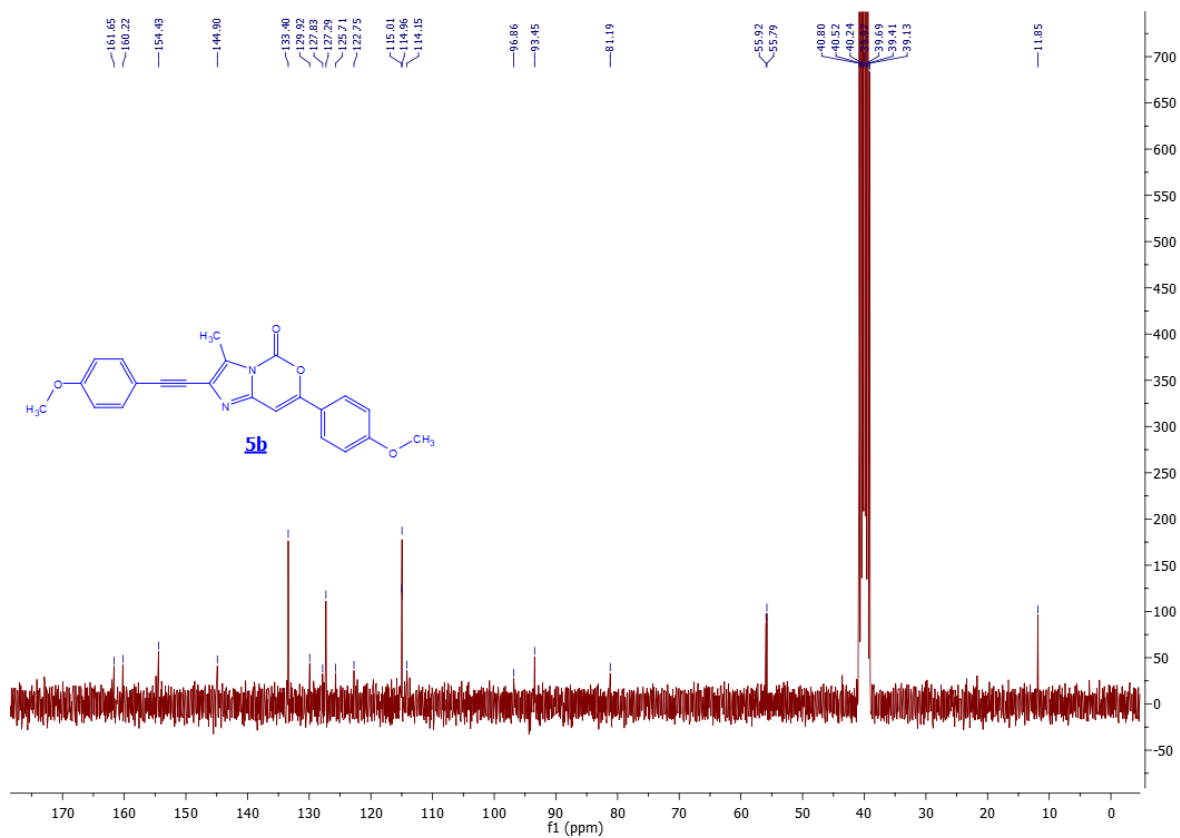

$^1\text{H}$  NMR (300 MHz,  $\text{CDCl}_3$ ) of **5c**

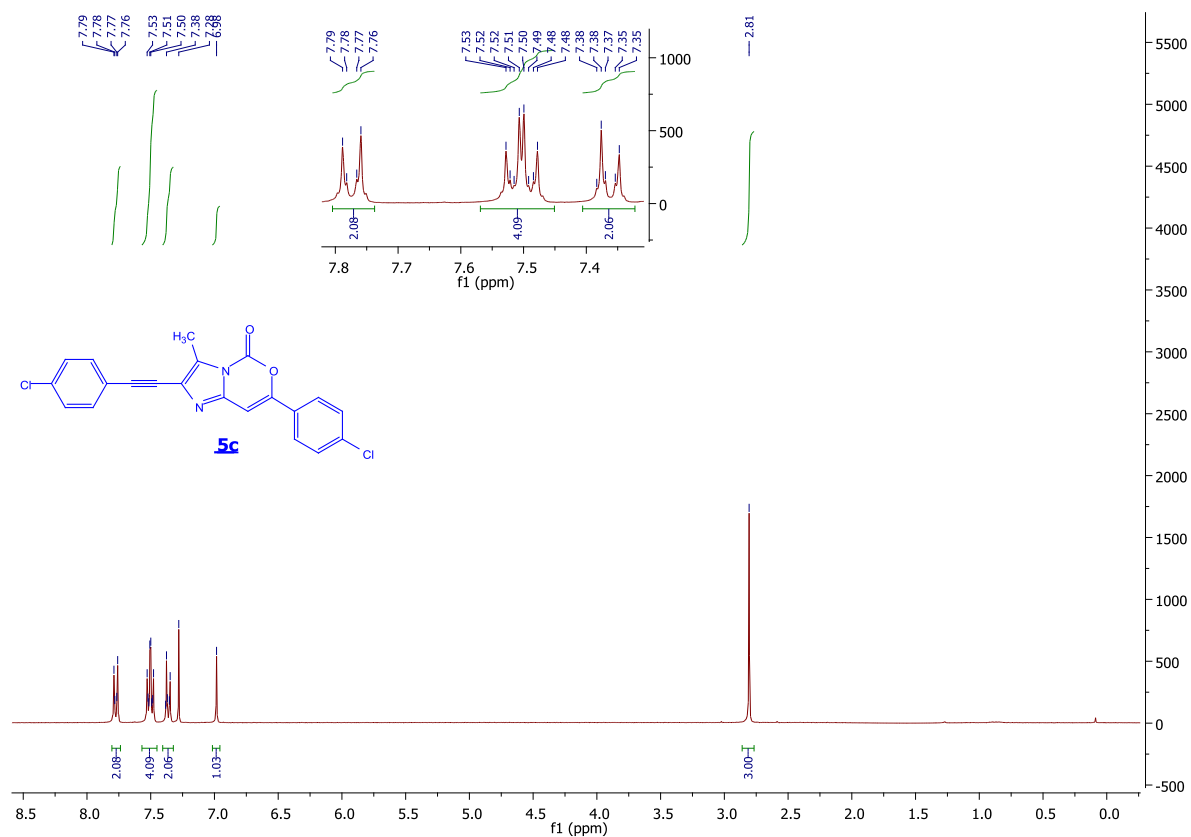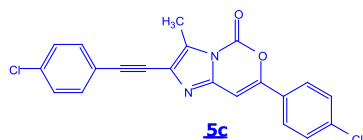

$^{13}\text{C}$  NMR (75 MHz,  $\text{THF-}d_8$ ) of **5c**

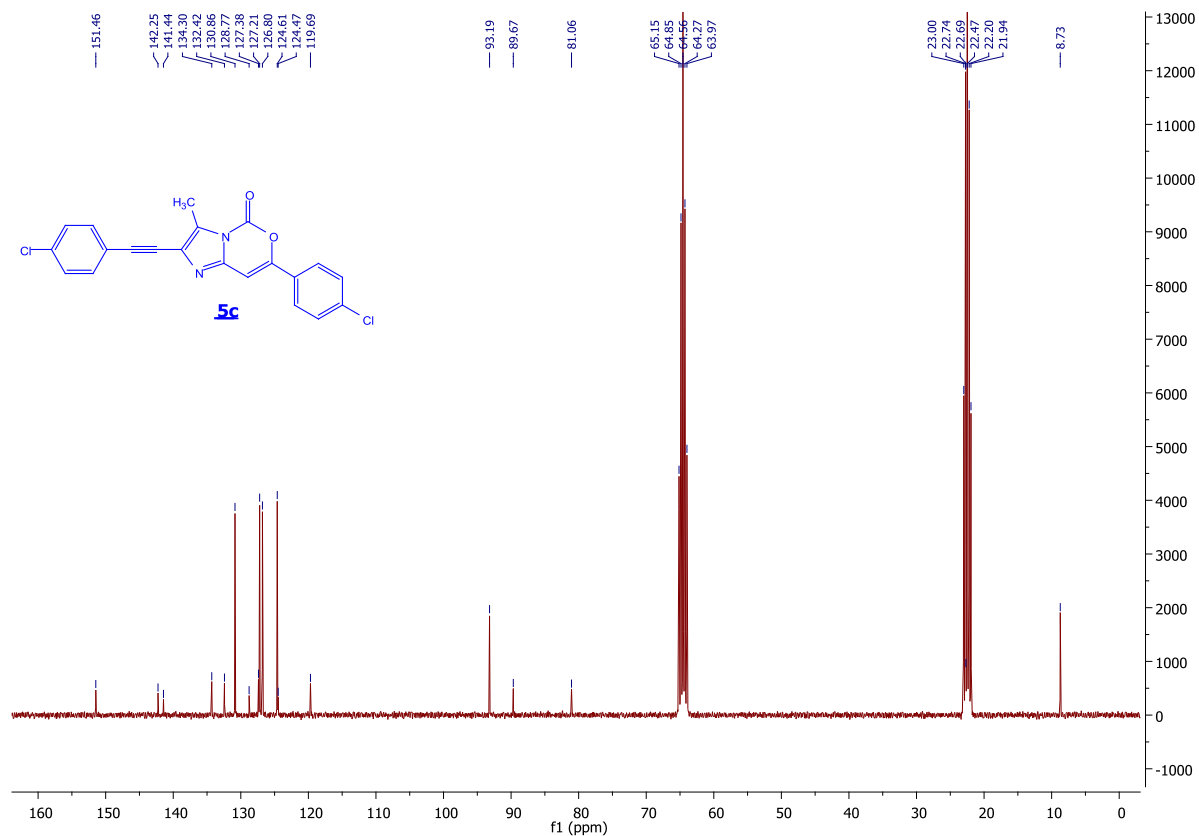

<sup>1</sup>H NMR (300 MHz, CDCl<sub>3</sub>) of **5d**

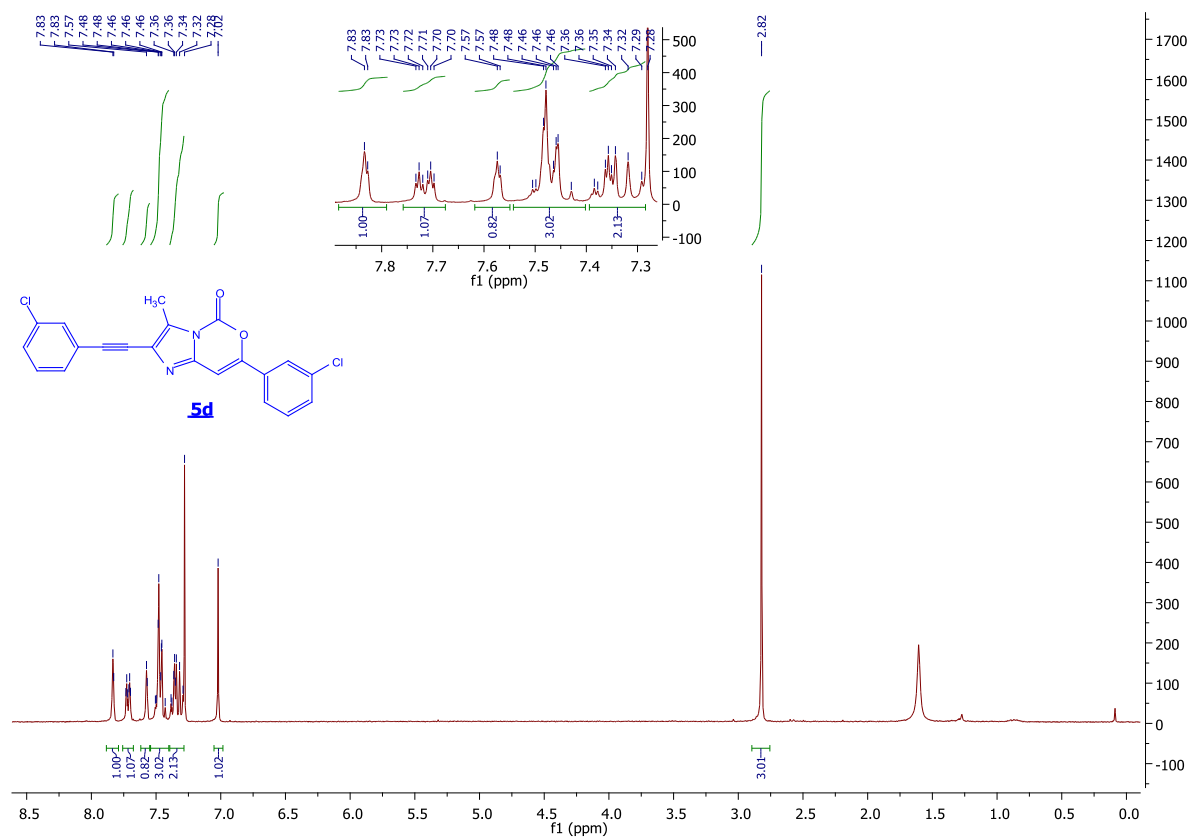

<sup>13</sup>C NMR (75 MHz, CDCl<sub>3</sub>) of **5d**

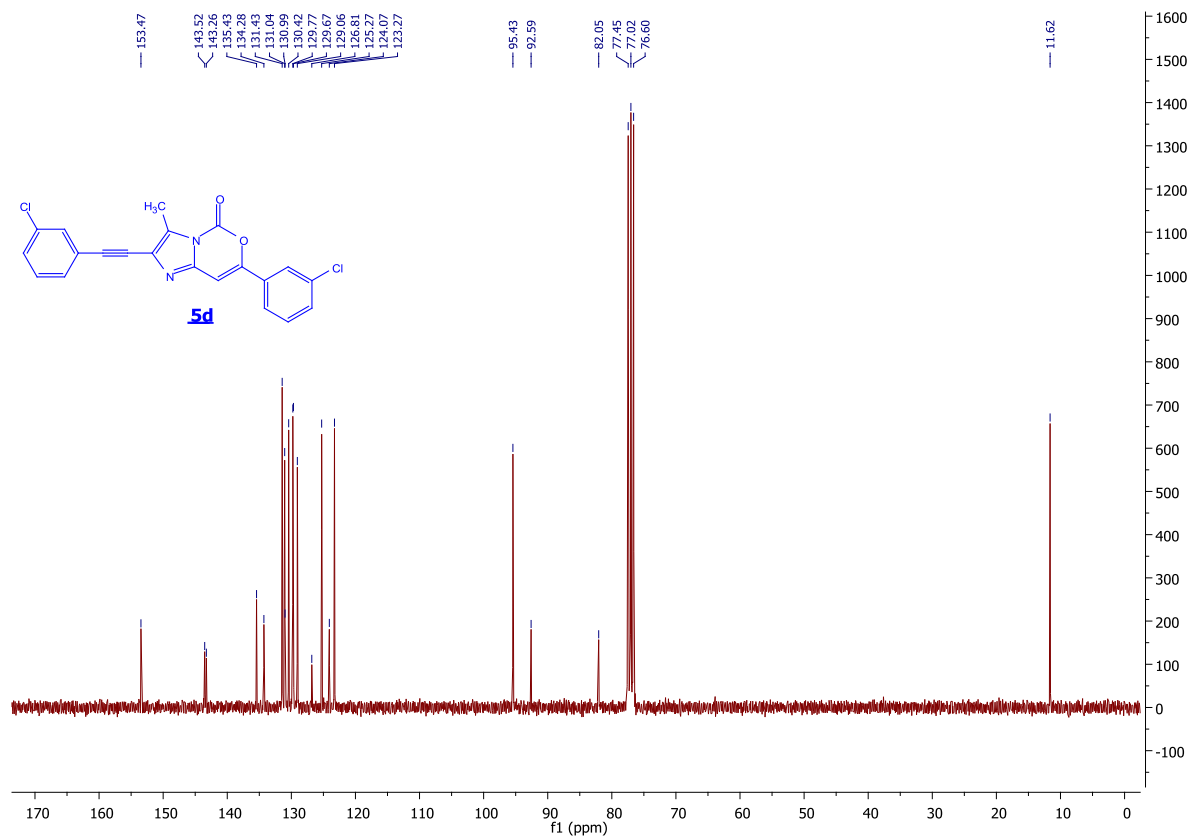



<sup>1</sup>H NMR (300 MHz, CDCl<sub>3</sub>) of **5f**

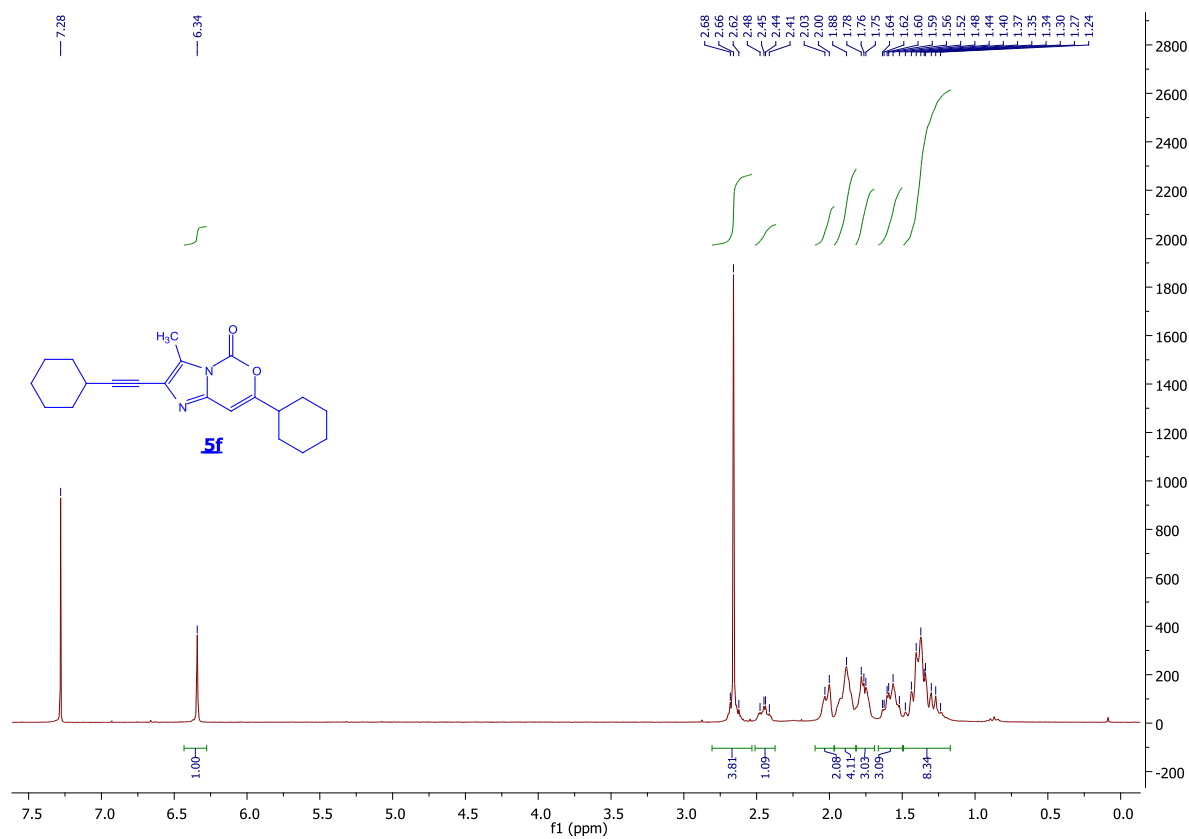

<sup>13</sup>C NMR (75 MHz, CDCl<sub>3</sub>) of **5f**

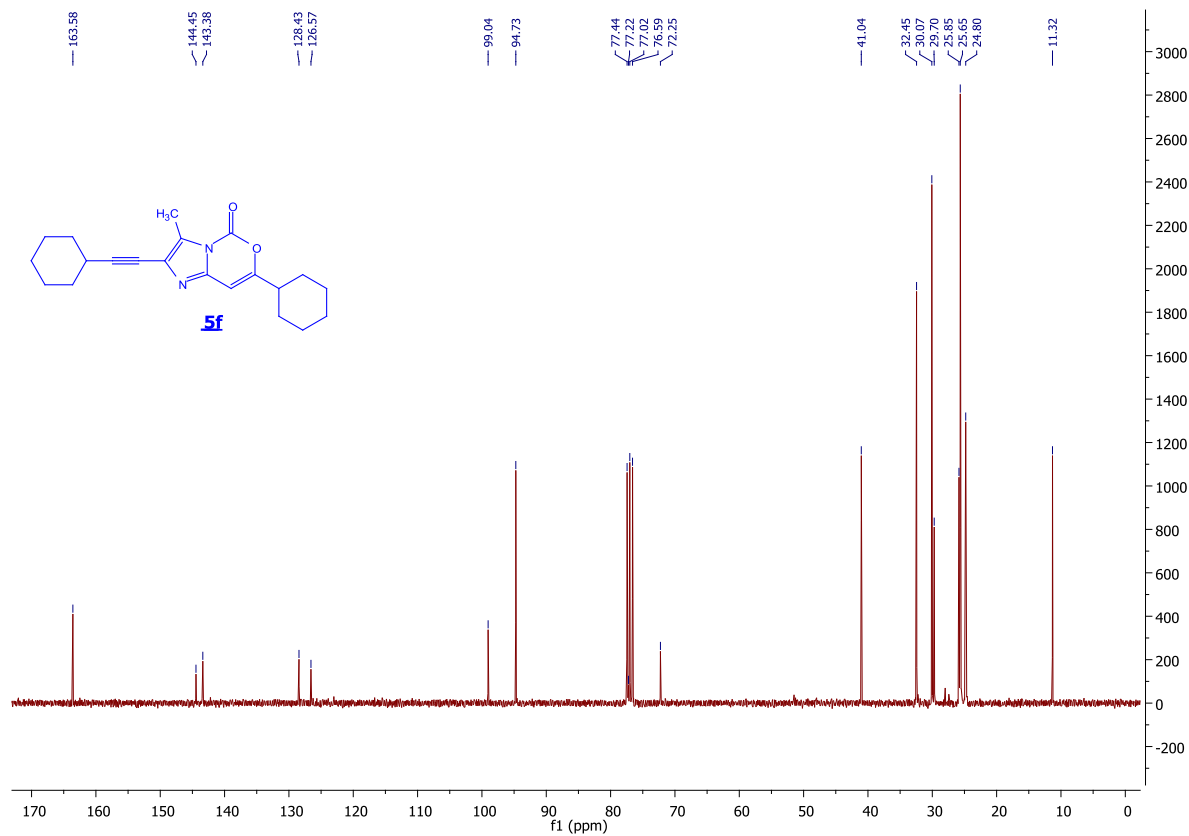

$^1\text{H}$  NMR (300 MHz,  $\text{CDCl}_3$ ) of **5g**

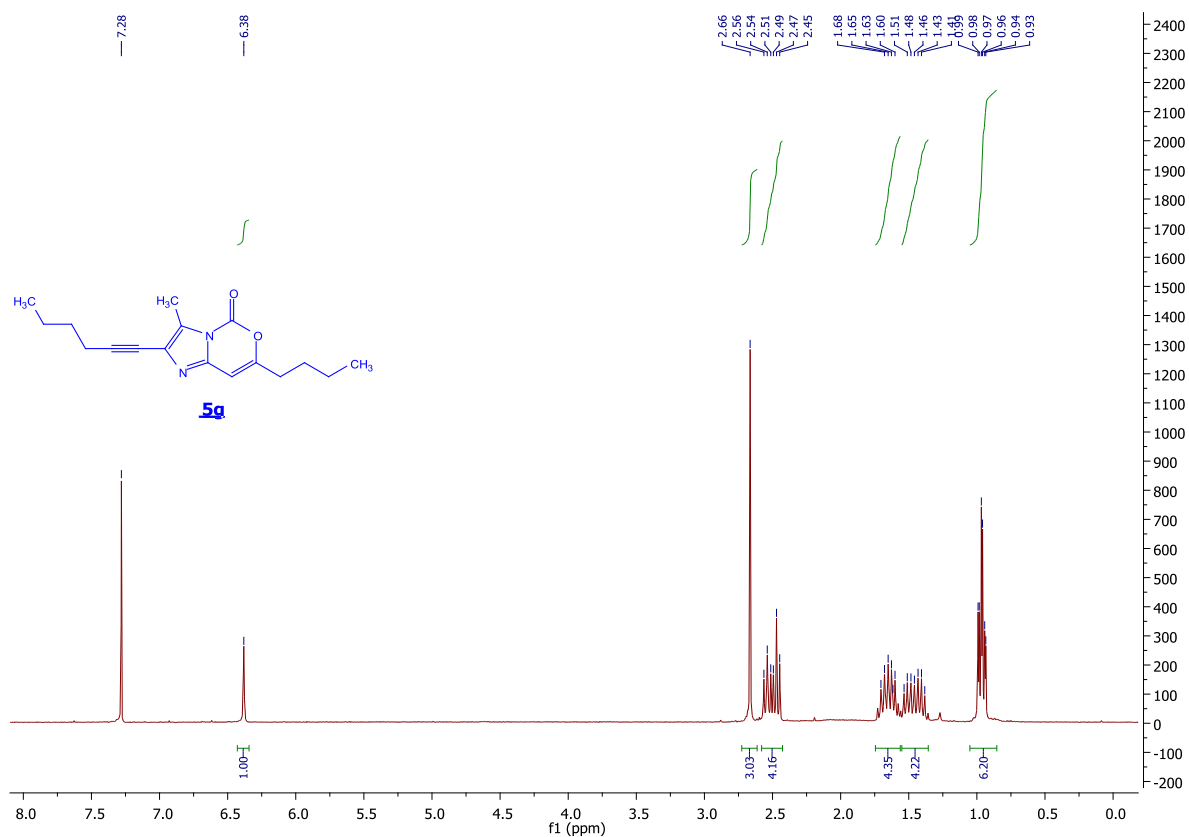

$^{13}\text{C}$  NMR (75 MHz,  $\text{CDCl}_3$ ) of **5g**

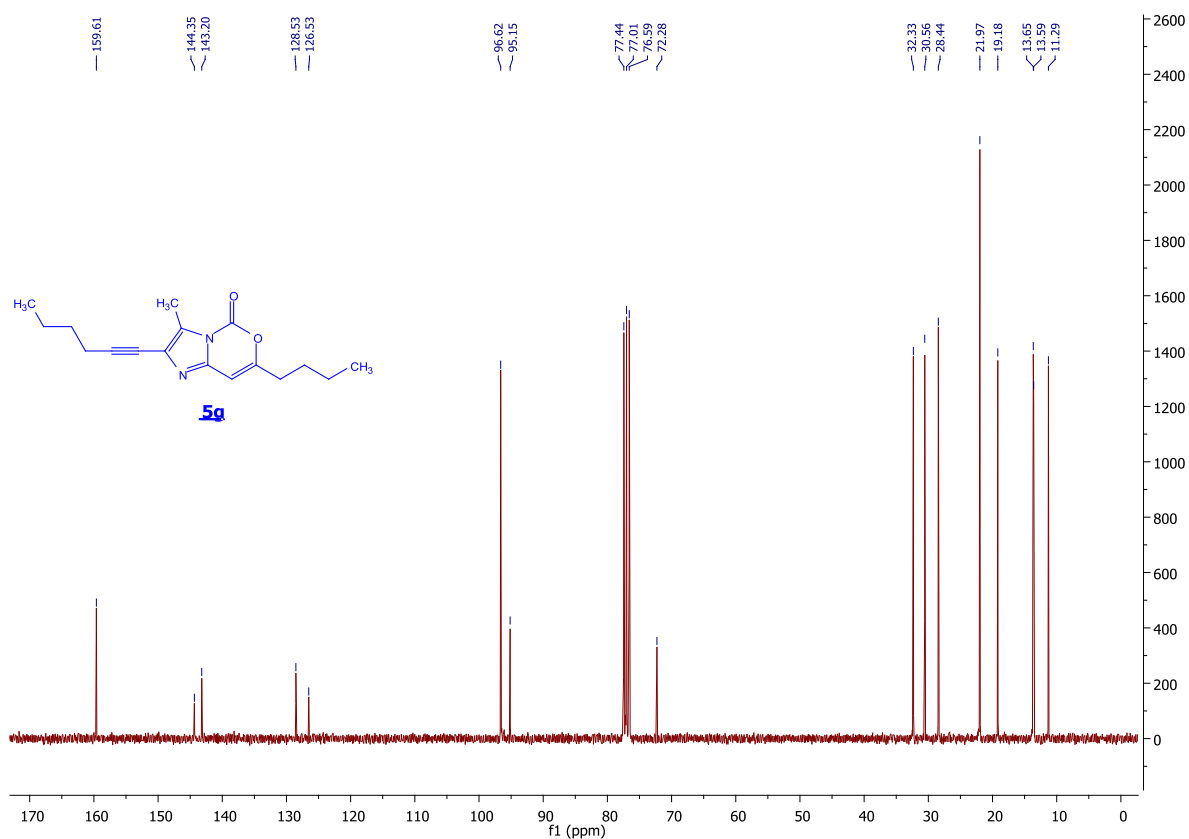

# $^1\text{H}$ NMR (300 MHz, $\text{CDCl}_3$ ) of **5h**

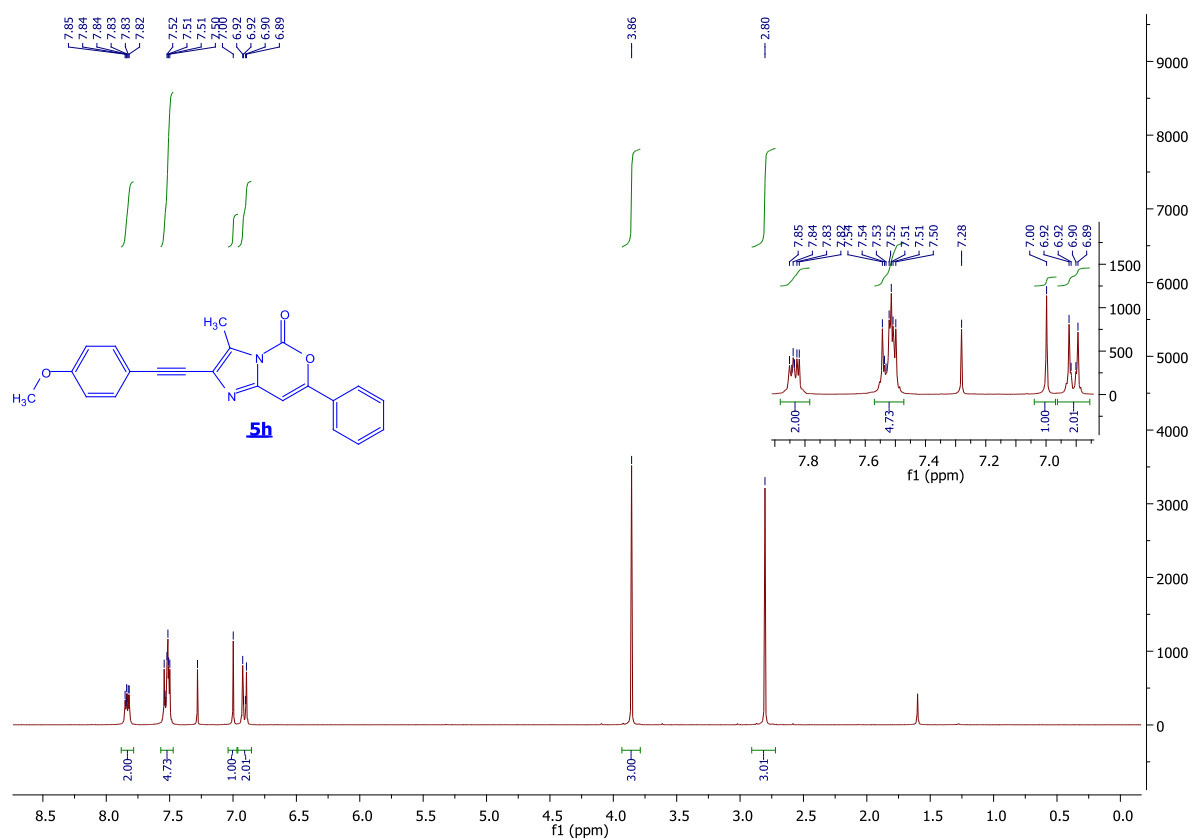

# $^{13}\text{C}$ NMR (75 MHz, $\text{CDCl}_3$ ) of **5h**

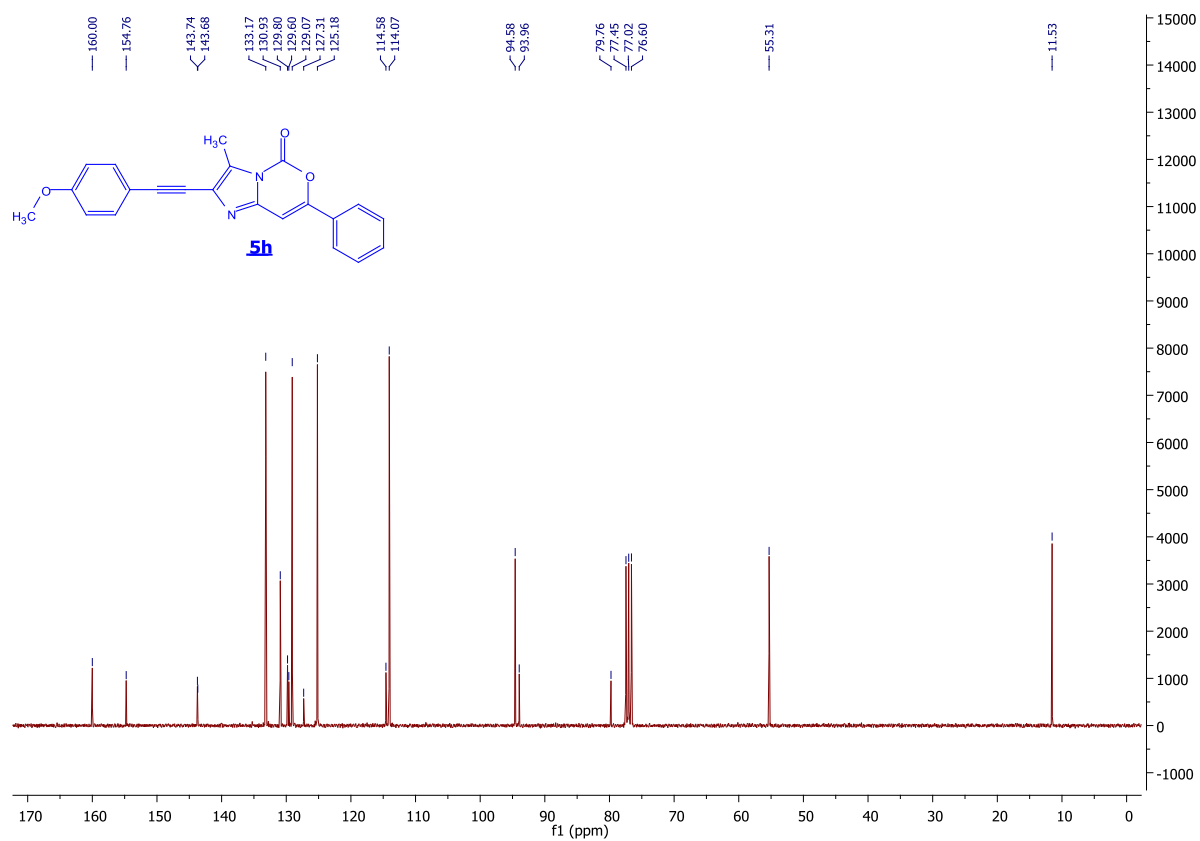

# $^1\text{H}$ NMR (300 MHz, $\text{CDCl}_3$ ) of **5i**

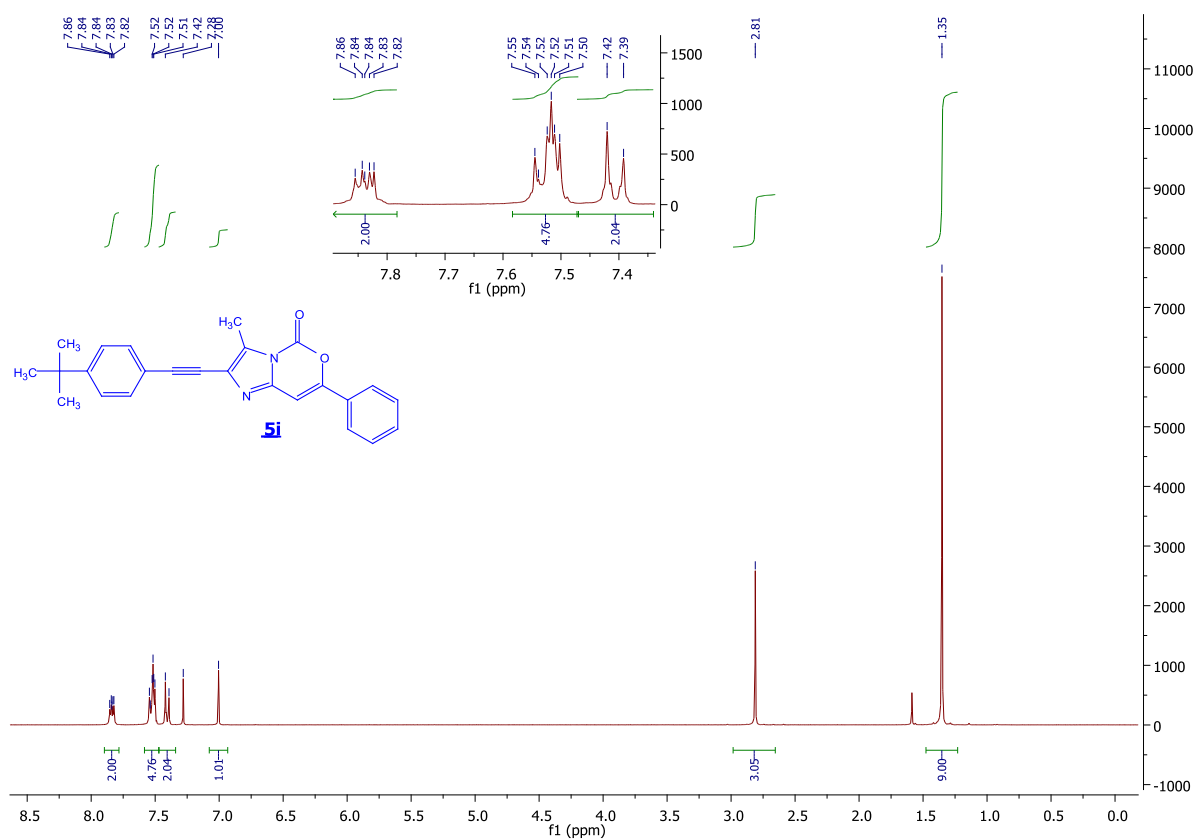

# $^{13}\text{C}$ NMR (75 MHz, $\text{CDCl}_3$ ) of **5i**

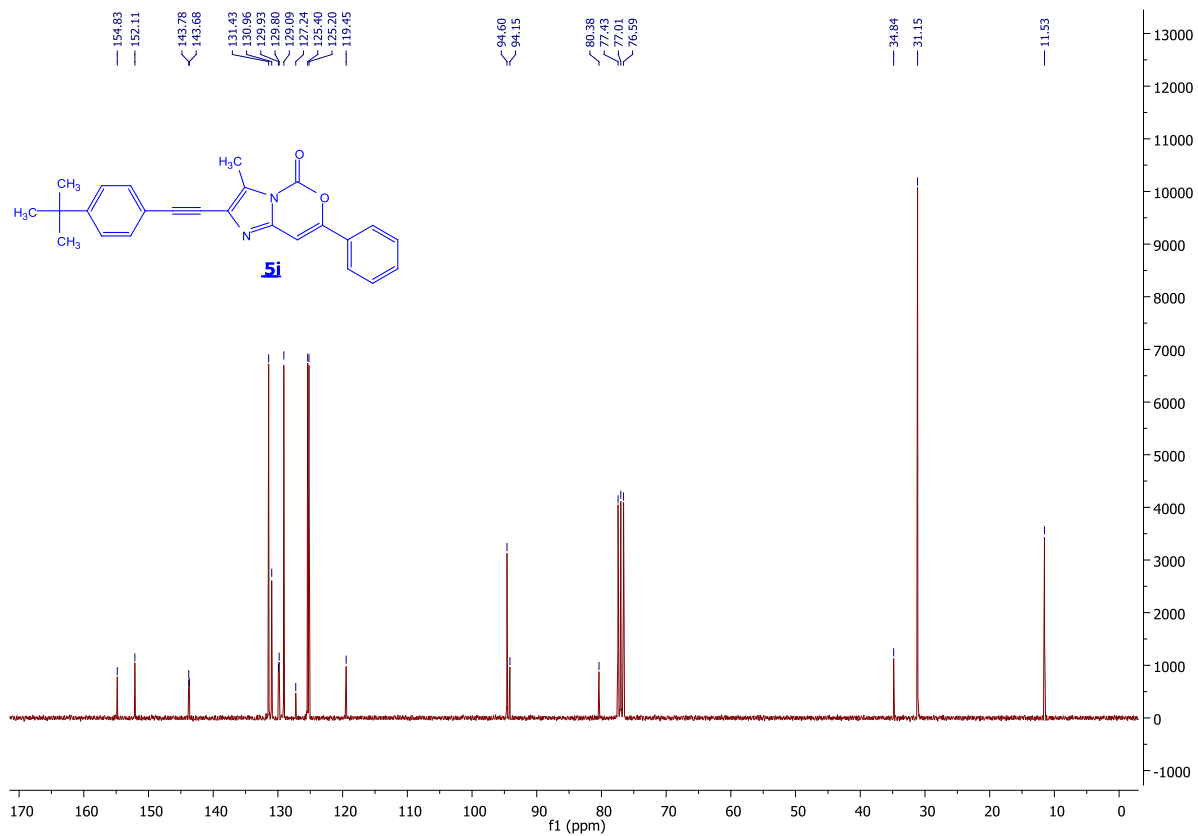



$^1\text{H}$  NMR (300 MHz,  $\text{CDCl}_3$ ) of **5j**

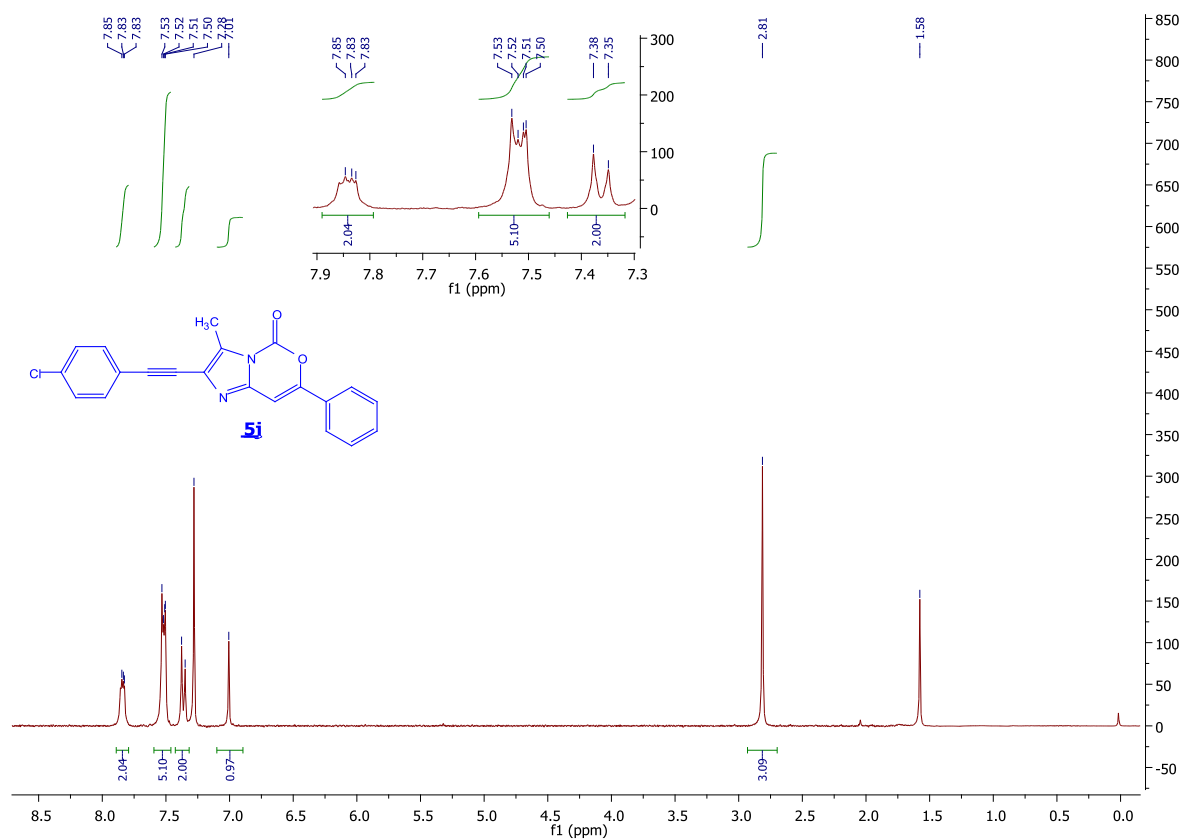

$^{13}\text{C}$  NMR (75 MHz,  $\text{CDCl}_3$ ) of **5j**

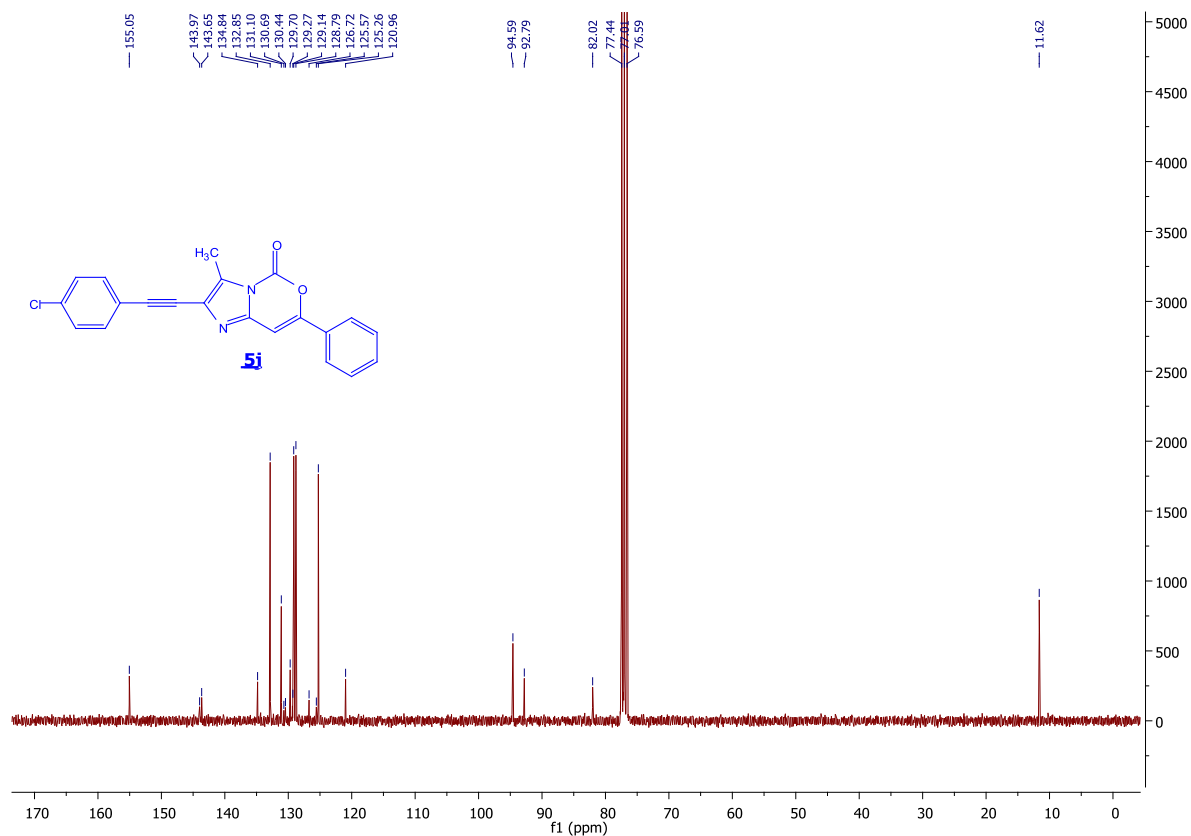

<sup>1</sup>H NMR (300 MHz, CDCl<sub>3</sub>) of **5k**

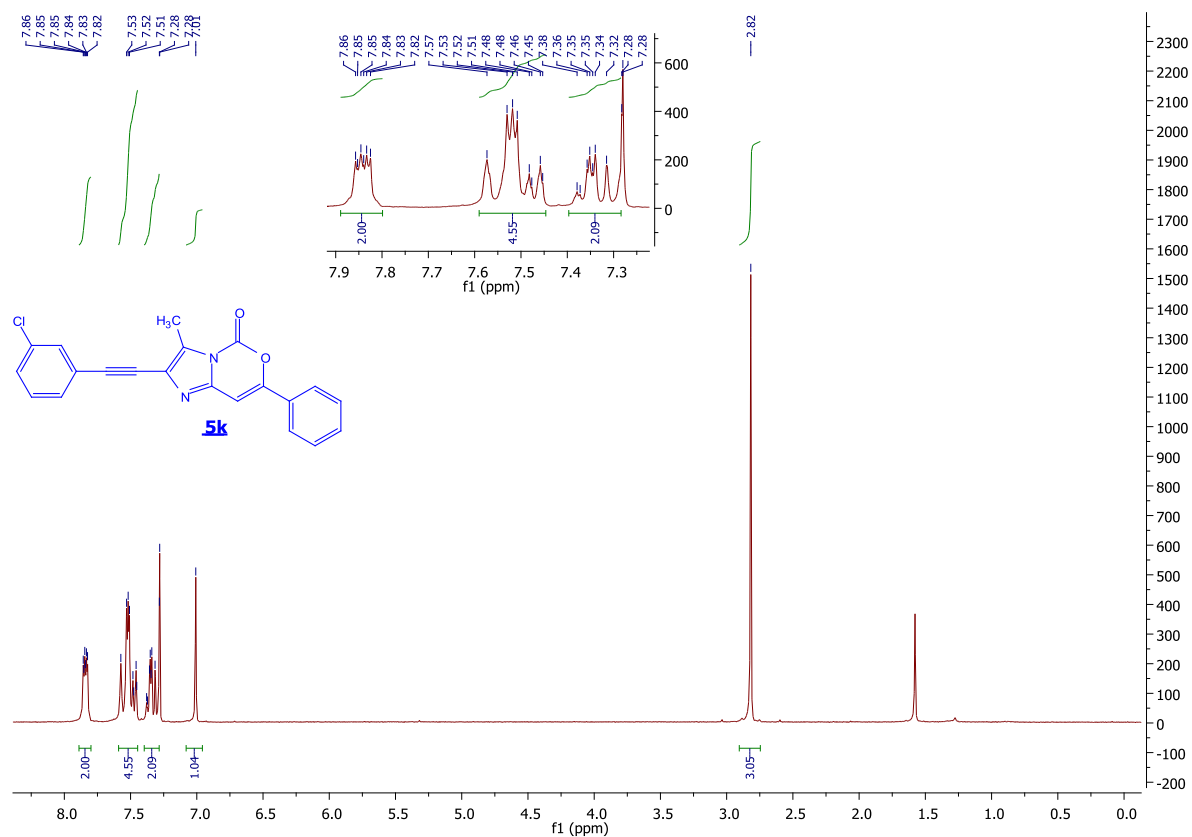

<sup>13</sup>C NMR (75 MHz, CDCl<sub>3</sub>) of **5k**

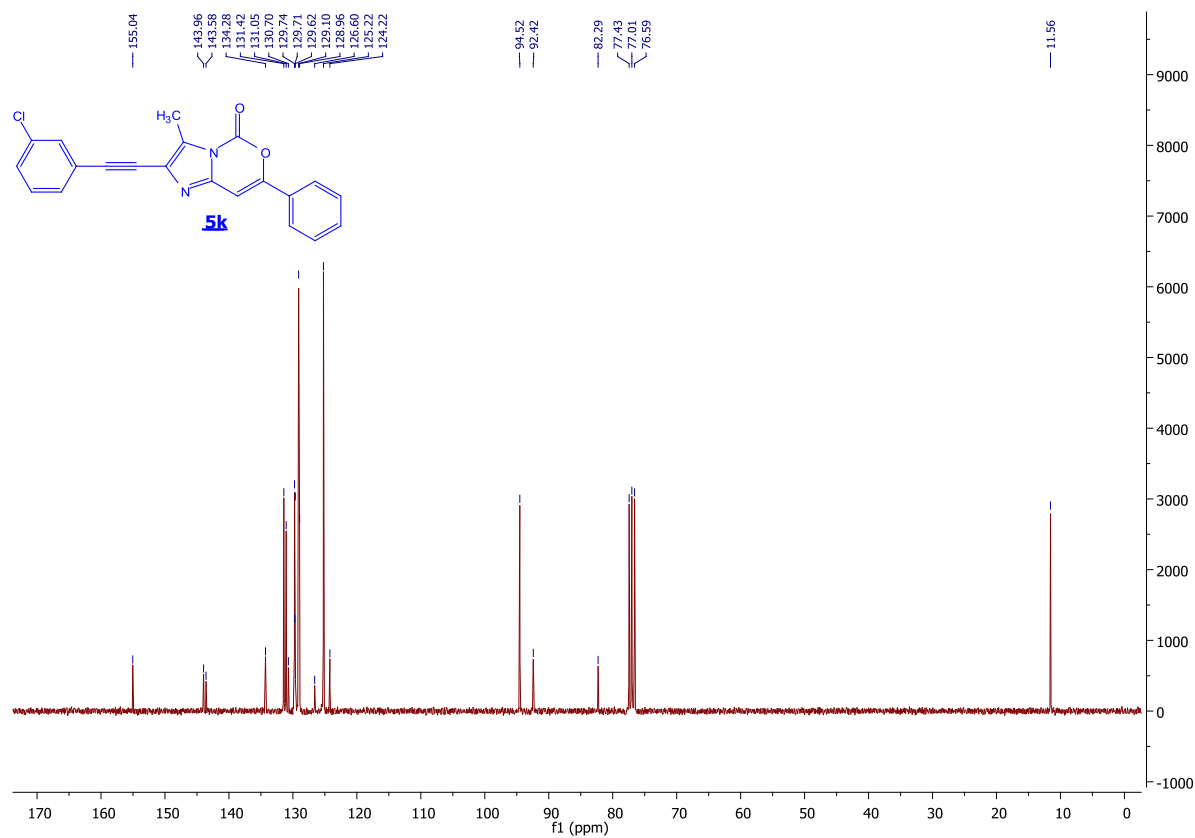

# $^1\text{H}$ NMR (300 MHz, $\text{CDCl}_3$ ) of **5I**

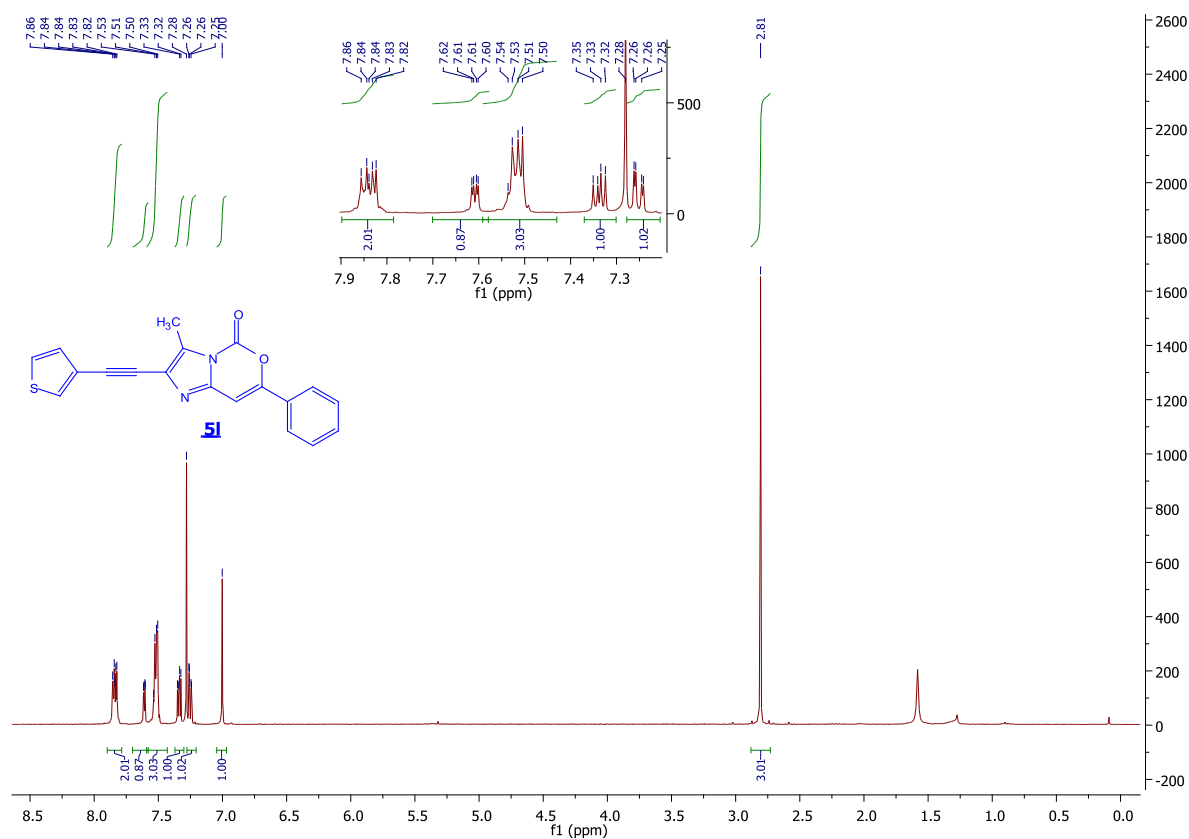

# $^{13}\text{C}$ NMR (75 MHz, $\text{CDCl}_3$ ) of **5I**

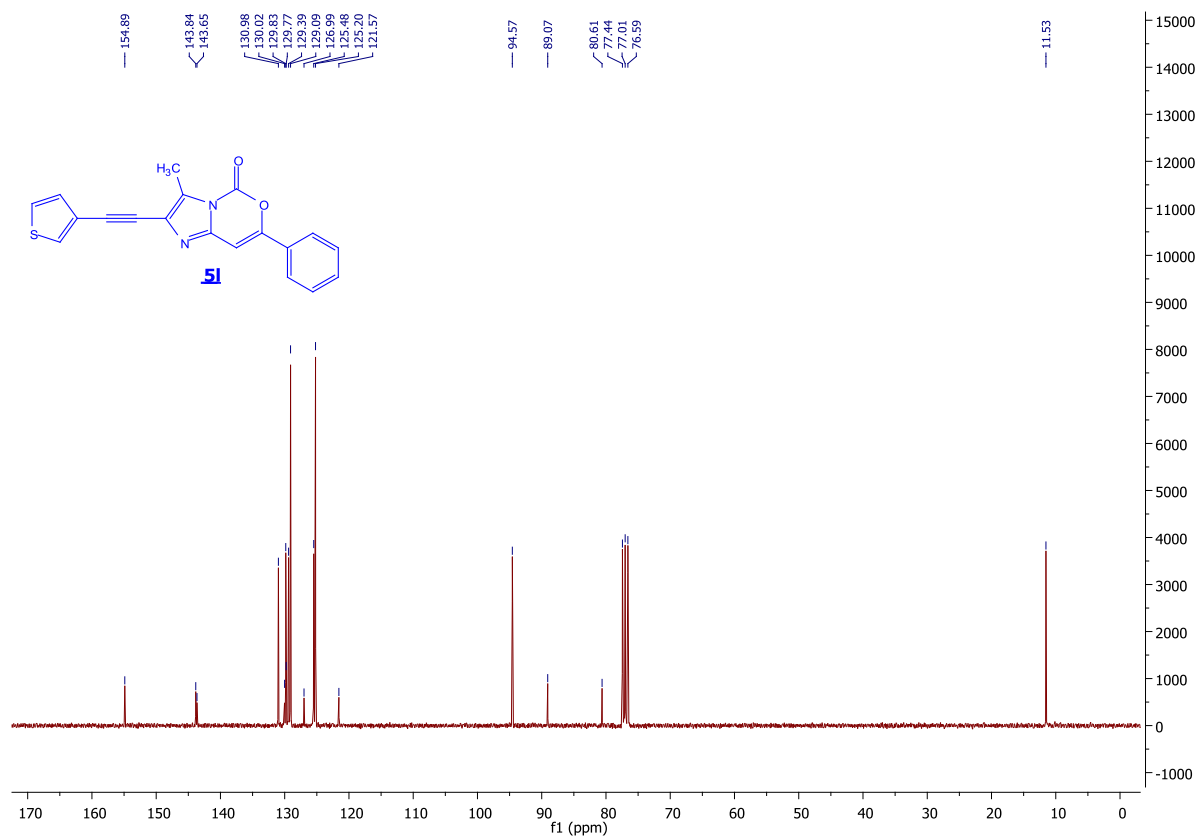

<sup>1</sup>H NMR (300 MHz, CDCl<sub>3</sub>) of **6a**

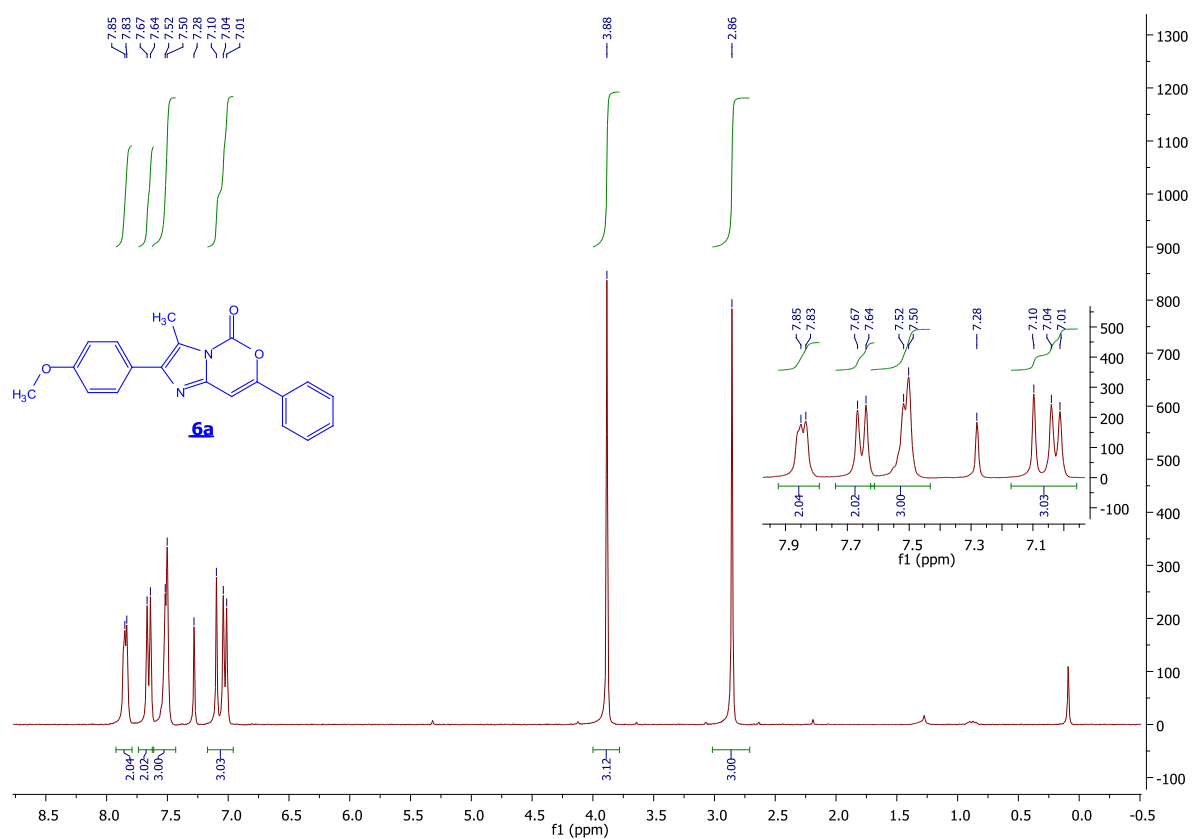

<sup>13</sup>C NMR (75 MHz, CDCl<sub>3</sub>) of **6a**

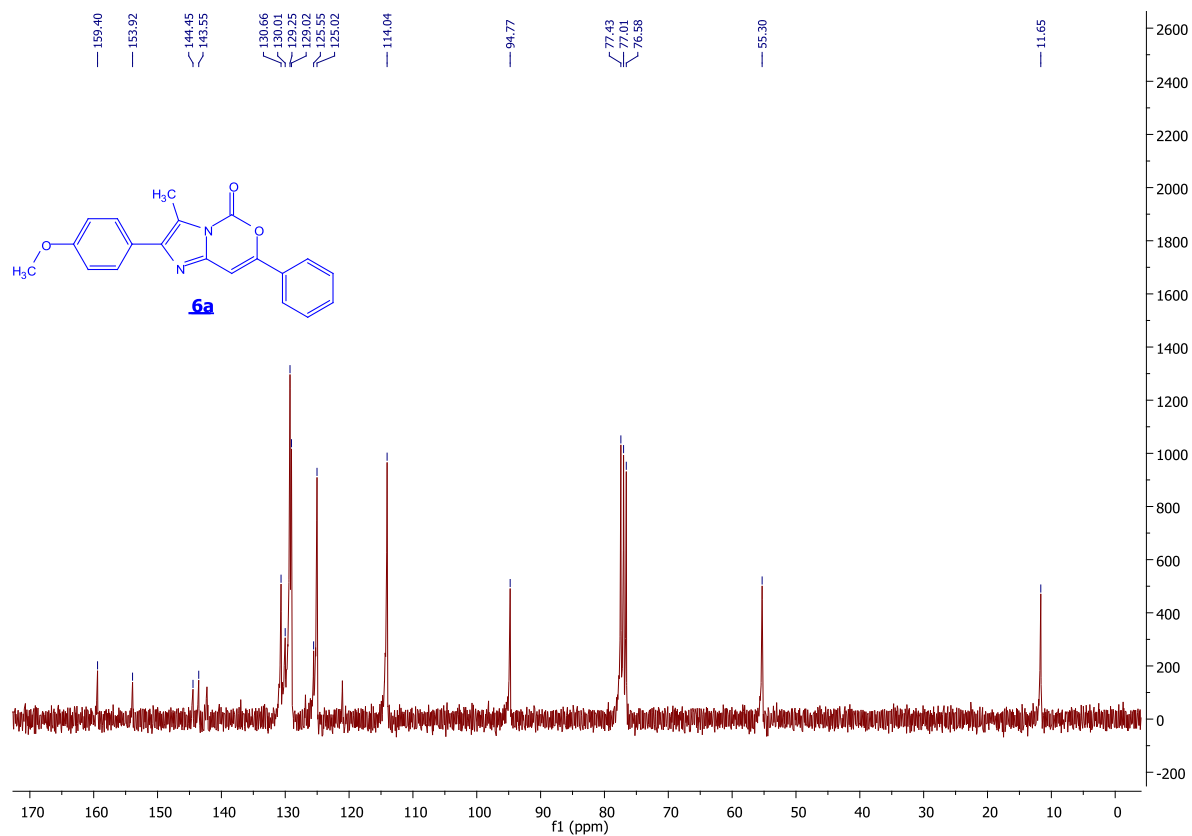

# $^1\text{H}$ NMR (300 MHz, $\text{CDCl}_3$ ) of **6b**

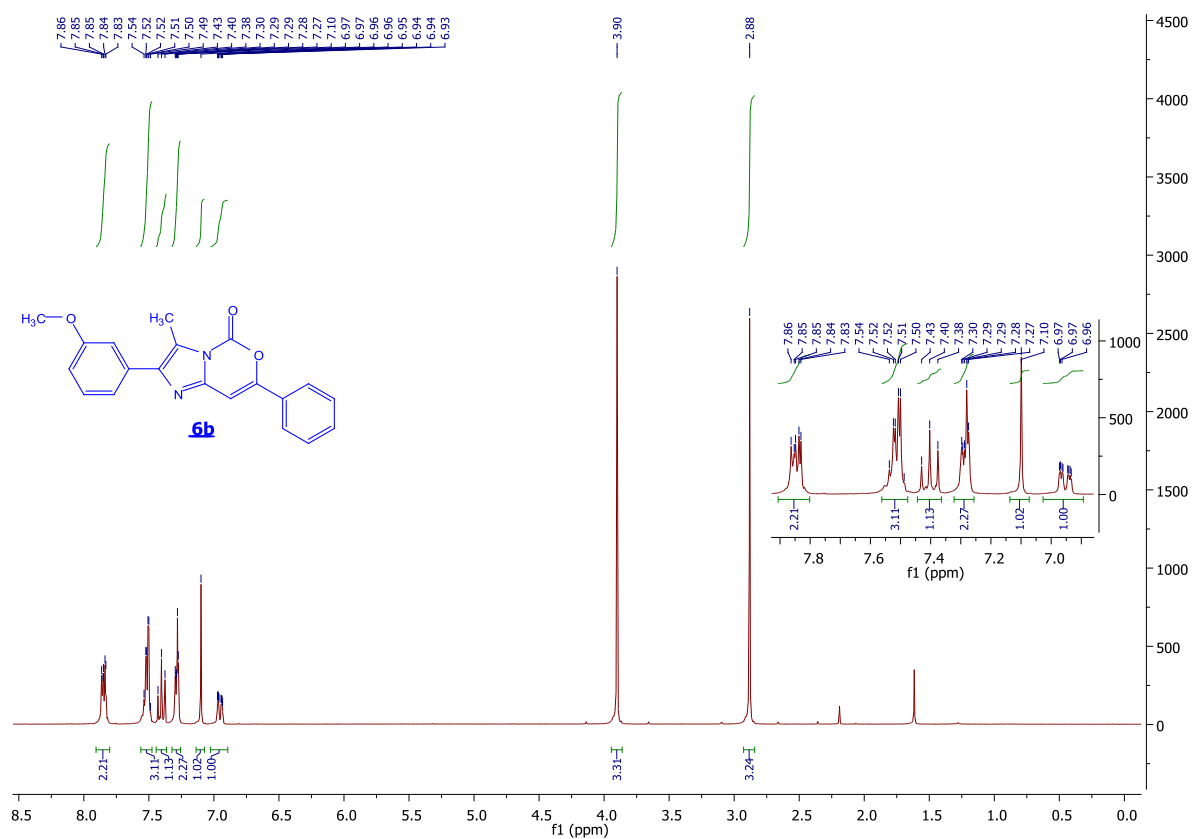

# $^{13}\text{C}$ NMR (75 MHz, $\text{CDCl}_3$ ) of **6b**

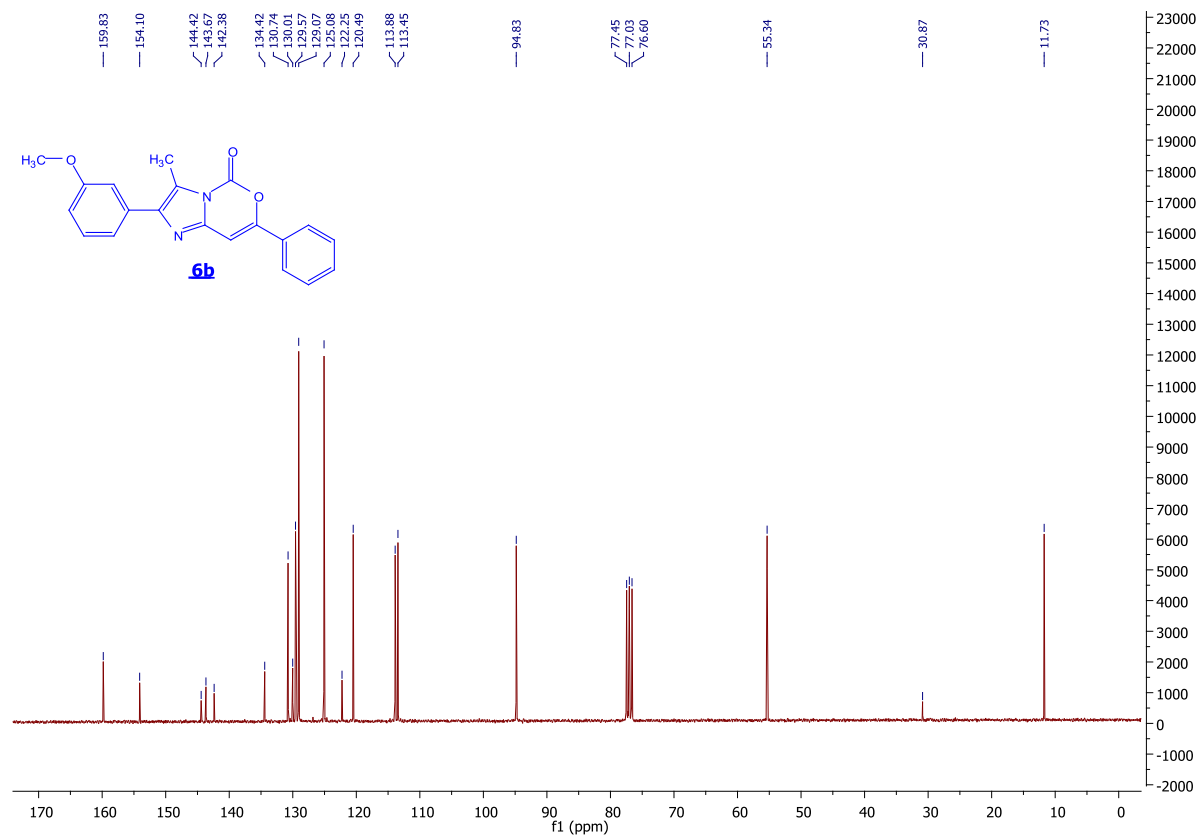

### $^1\text{H}$ NMR (300 MHz, $\text{CDCl}_3$ ) of **6c**

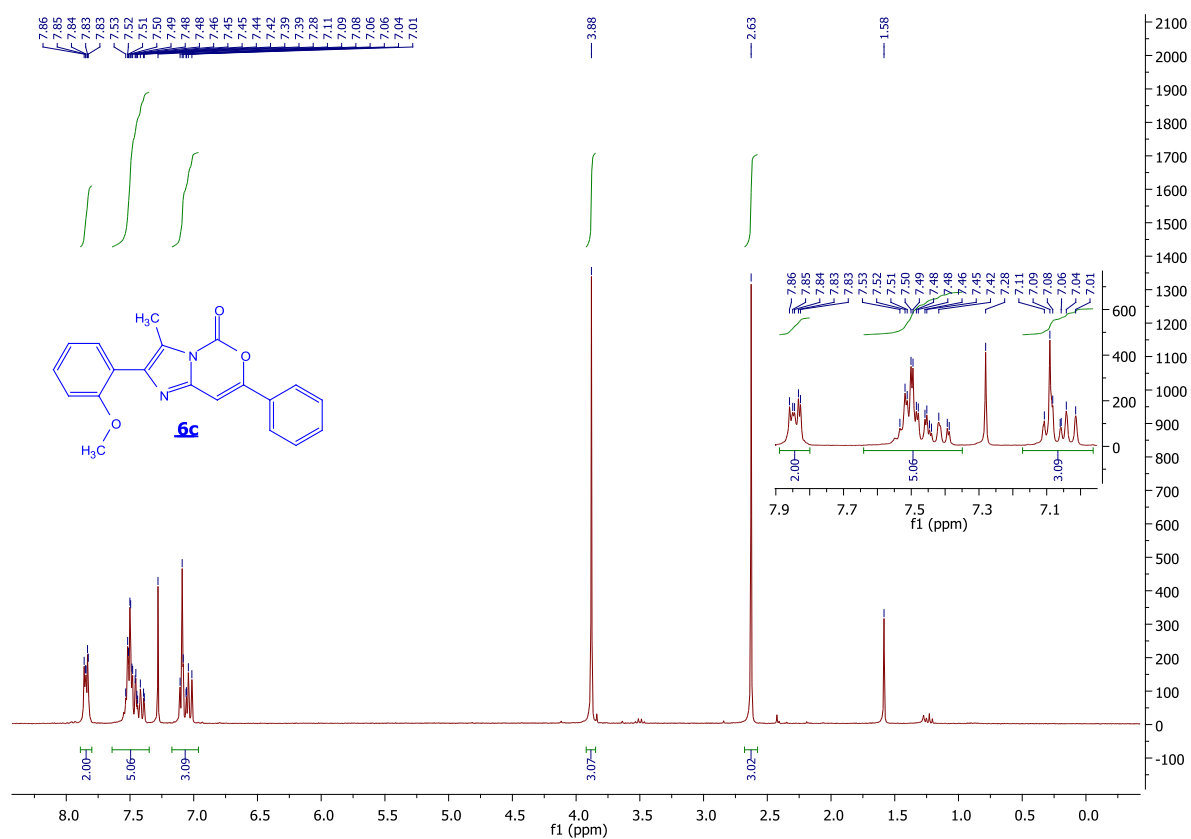

### $^{13}\text{C}$ NMR (75 MHz, $\text{CDCl}_3$ ) of **6c**

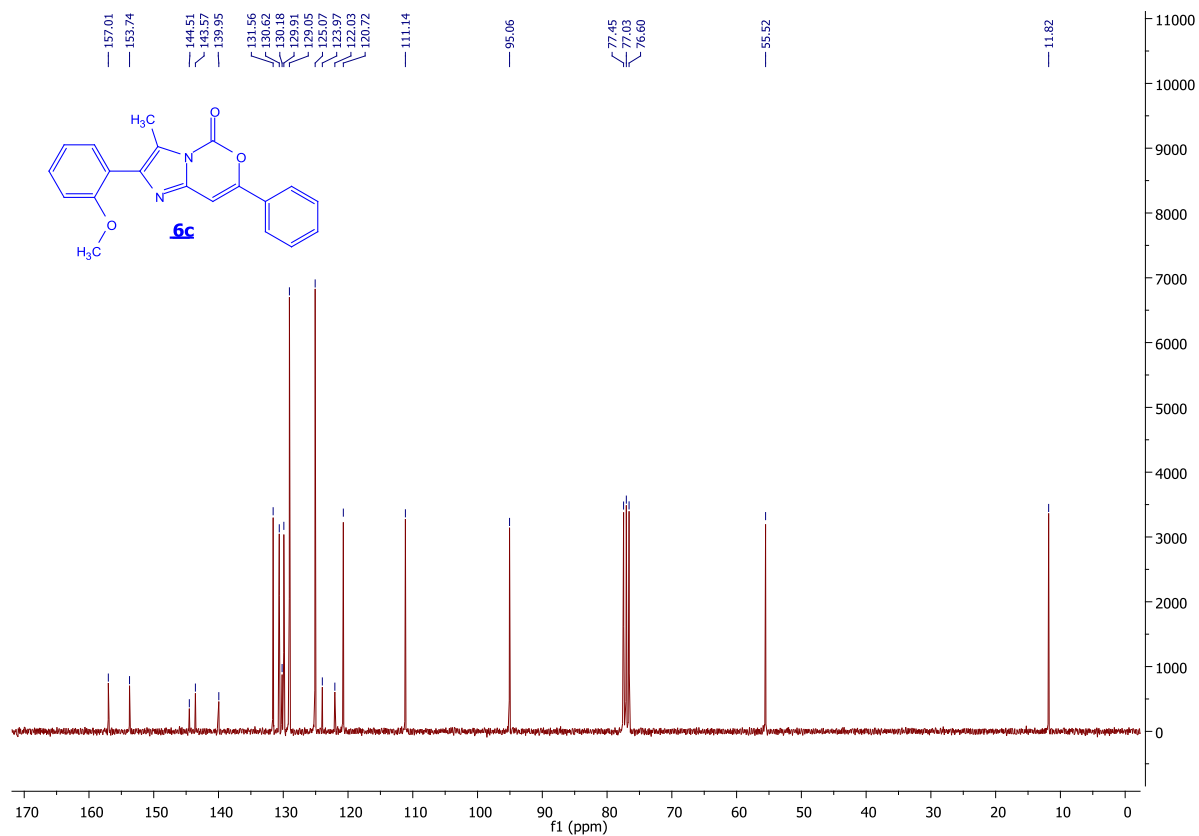



<sup>1</sup>H NMR (300 MHz, CDCl<sub>3</sub>) of **7a**

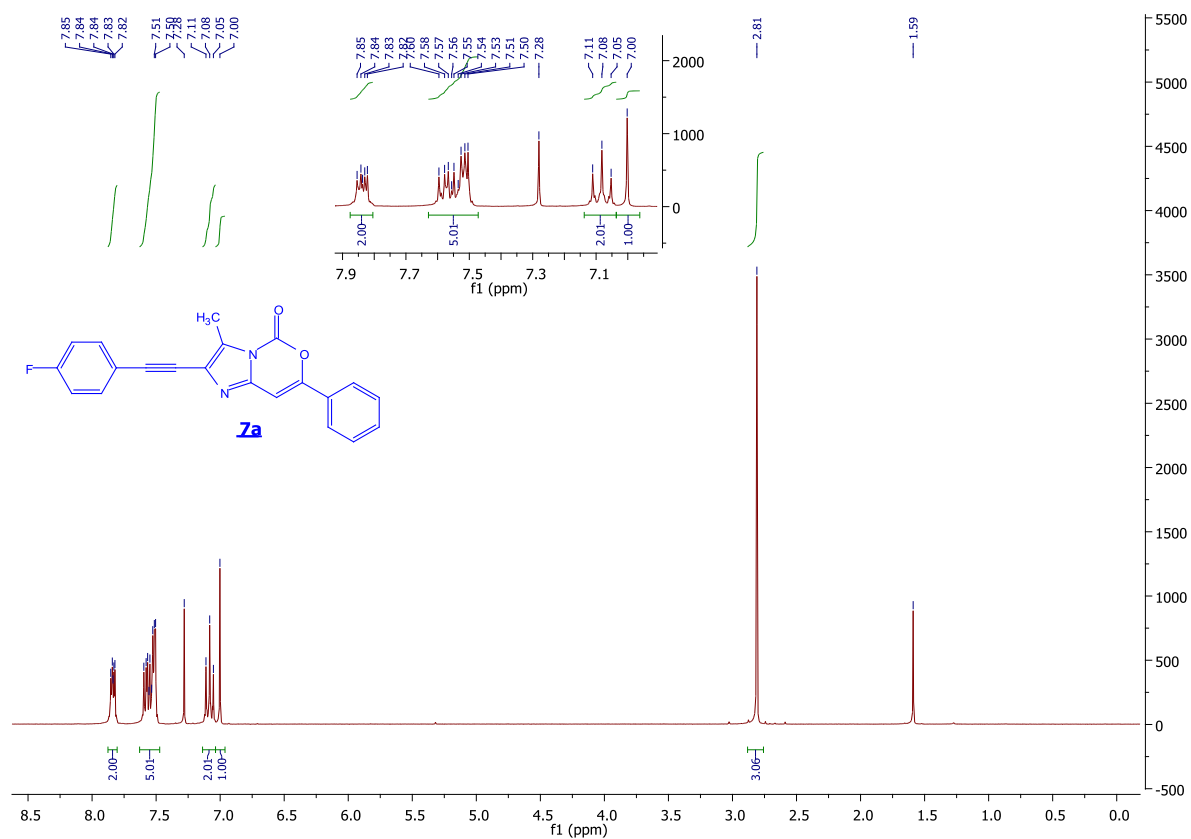

<sup>19</sup>F NMR (282 MHz, CDCl<sub>3</sub>) of **7a**

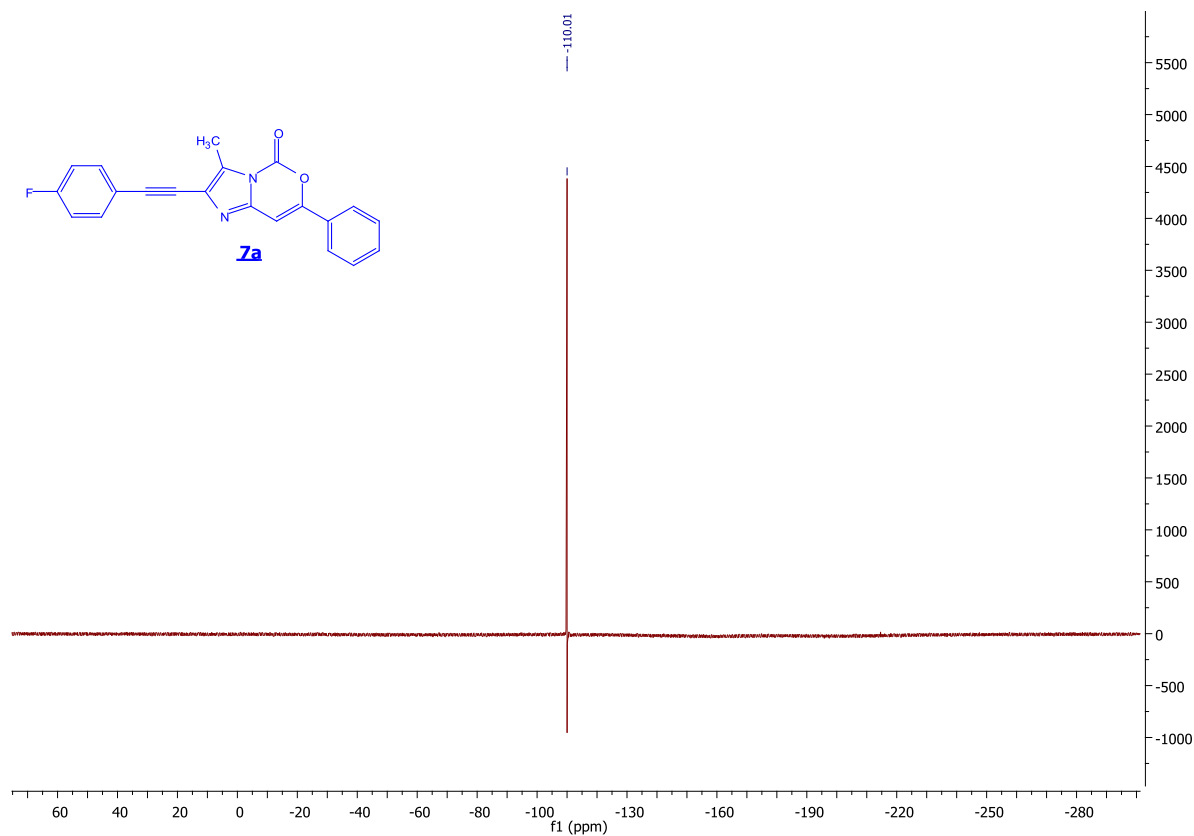



$^{13}\text{C}$  NMR (75 MHz,  $\text{CDCl}_3$ ) of **7a**

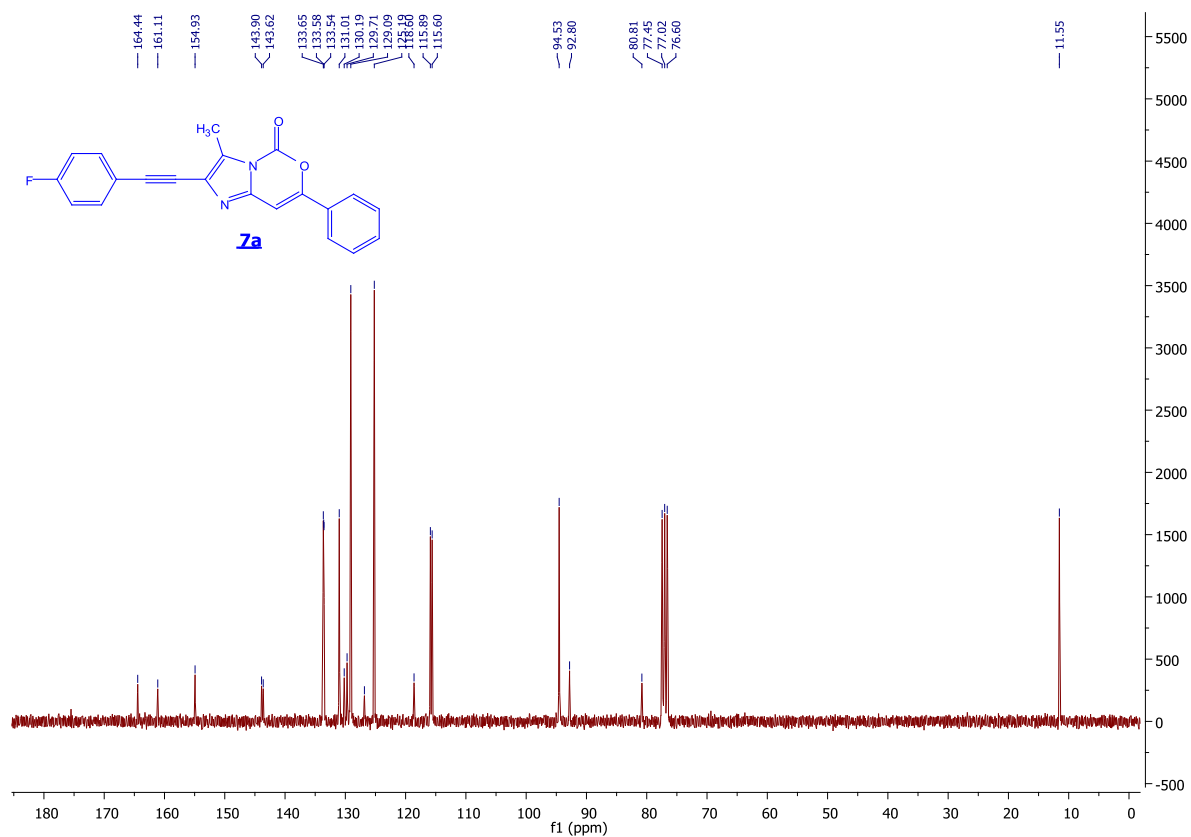

$^1\text{H}$  NMR (300 MHz,  $\text{CDCl}_3$ ) of **7b**

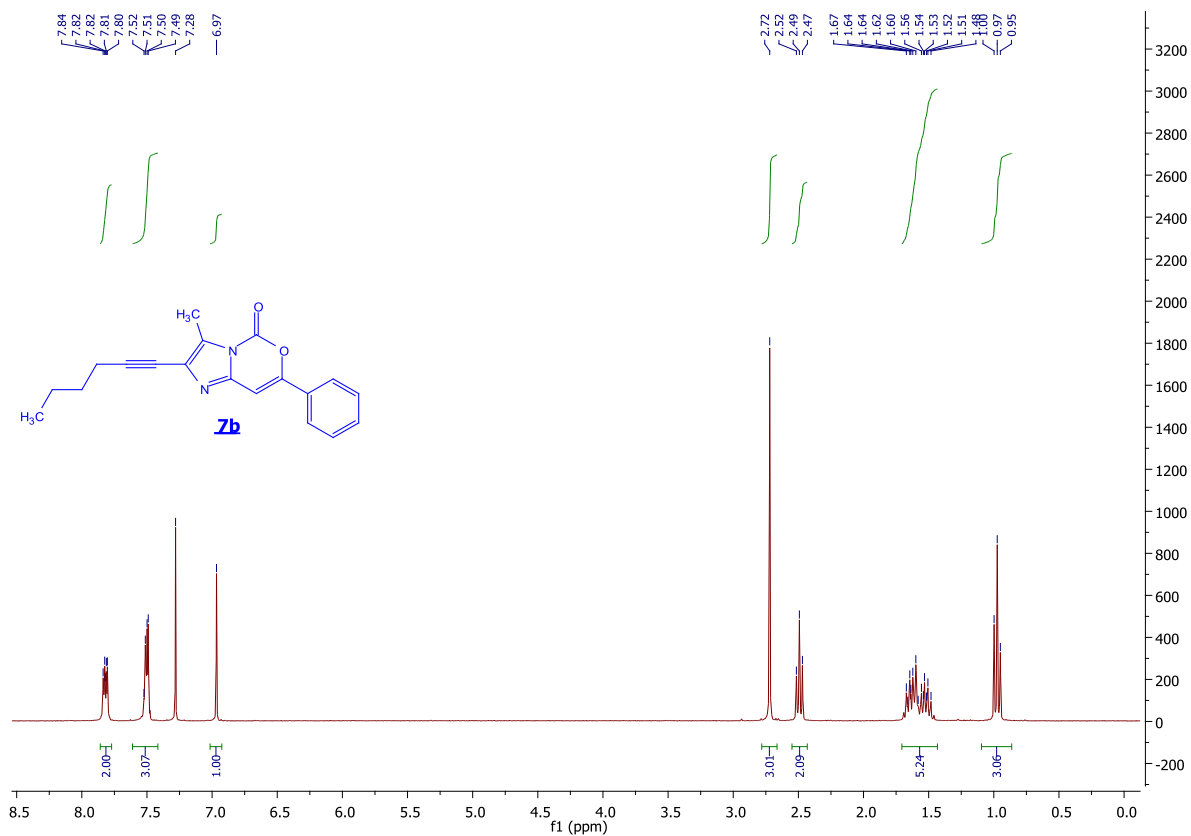

$^{13}\text{C}$  NMR (75 MHz,  $\text{CDCl}_3$ ) of **7b**

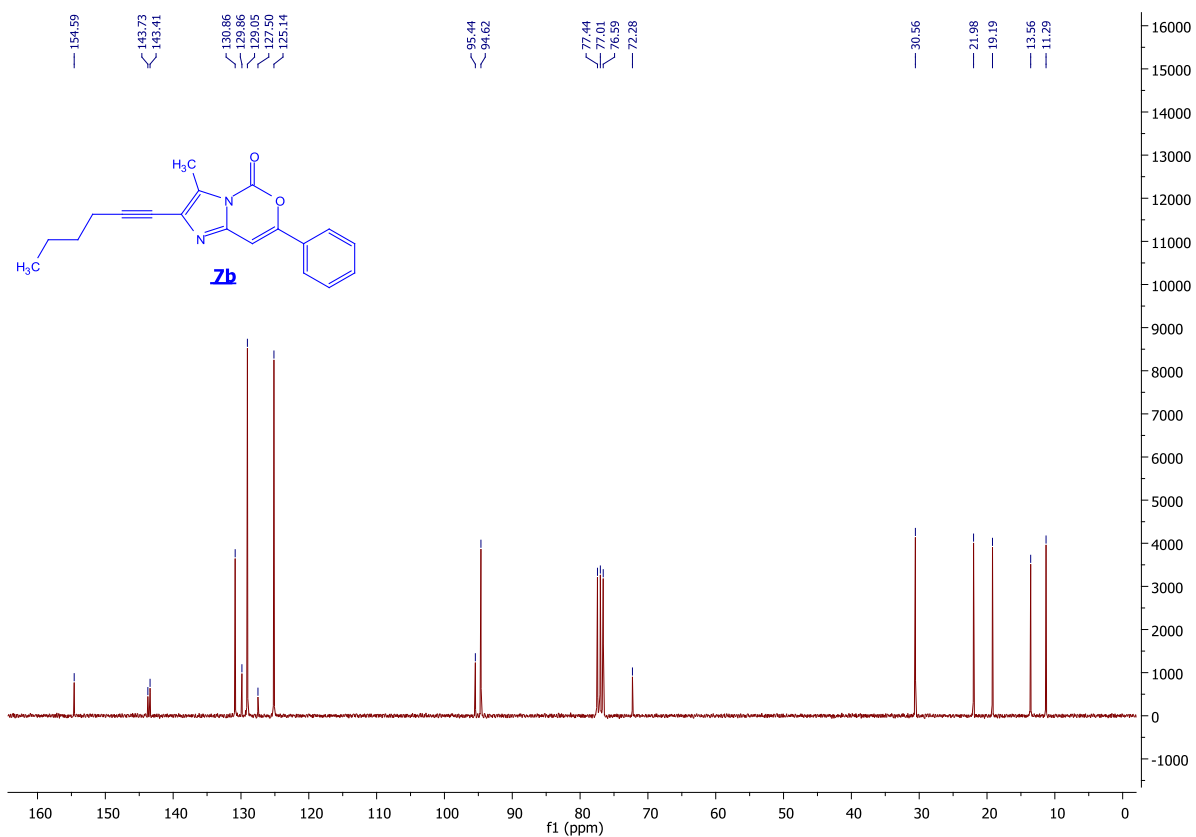

$^1\text{H}$  NMR (300 MHz,  $\text{CDCl}_3$ ) of **8a**

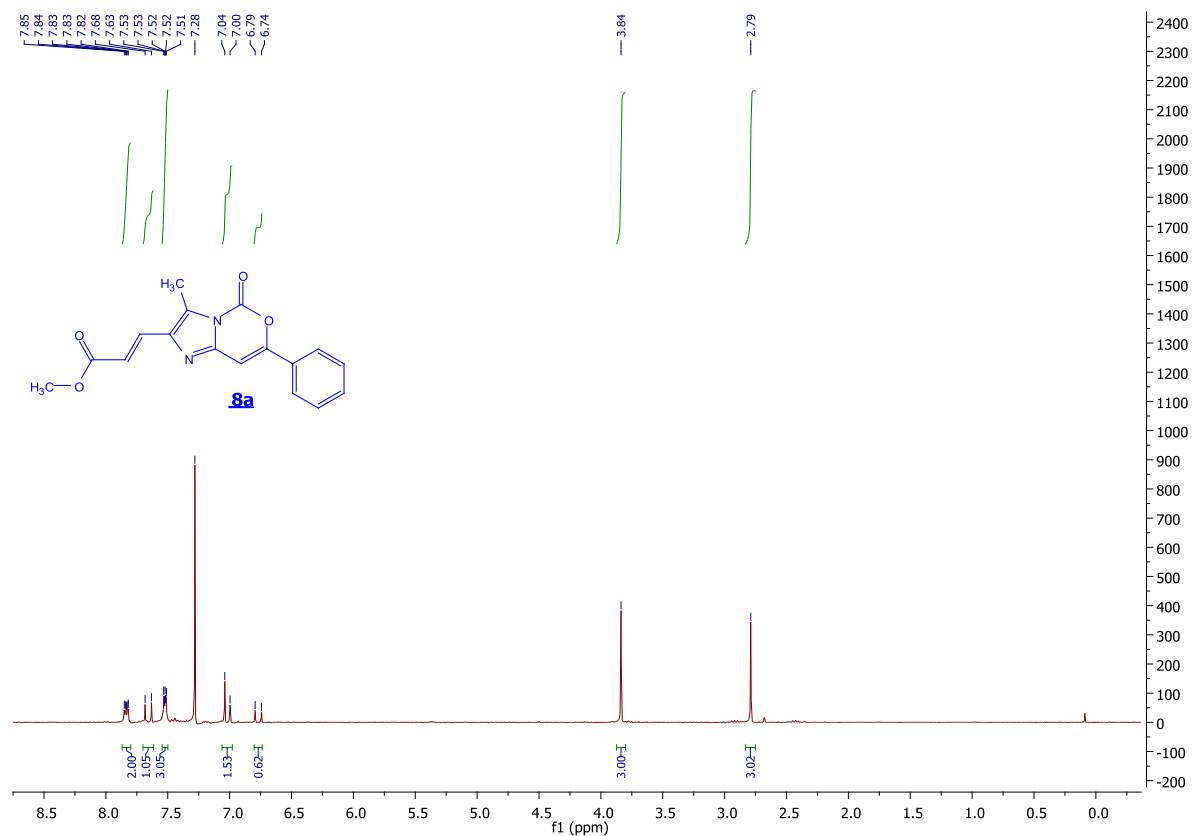

$^{13}\text{C}$  NMR (75 MHz,  $\text{CDCl}_3$ ) of **8a**

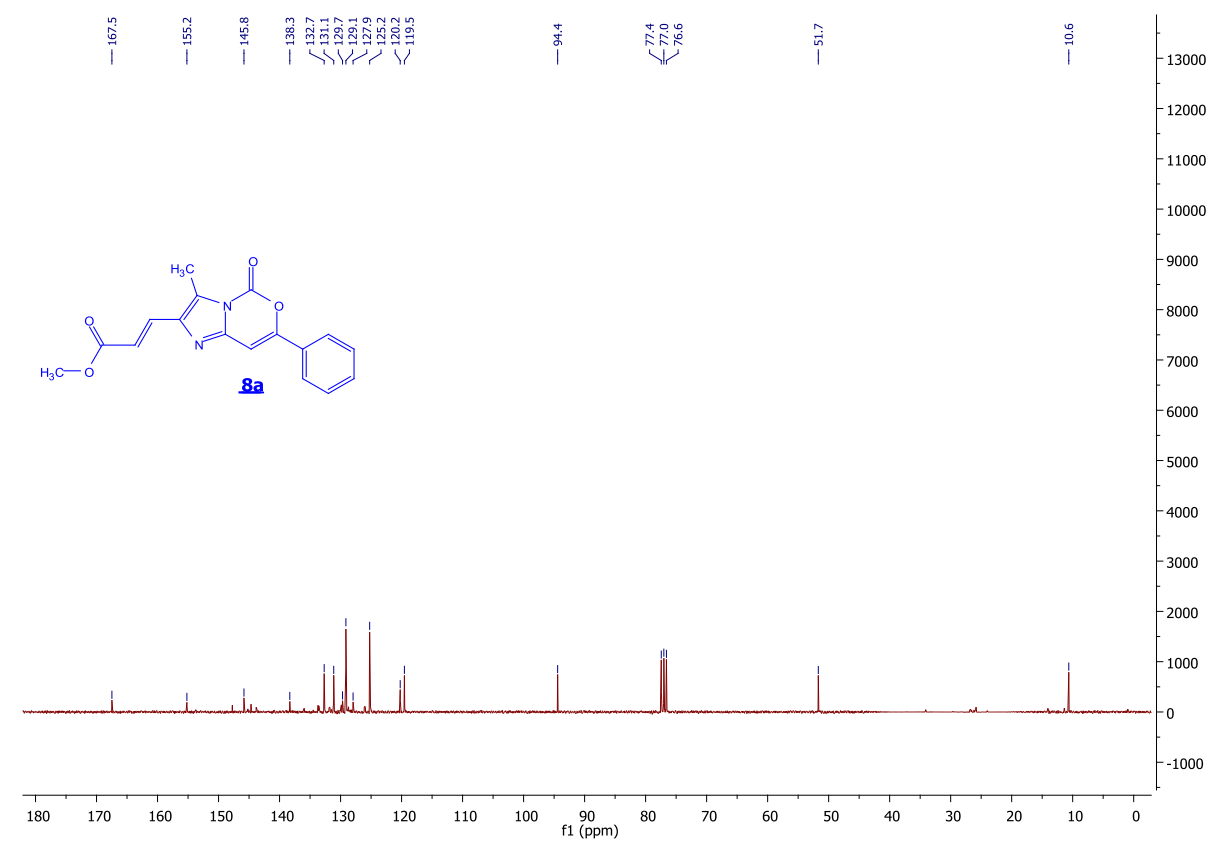

$^1\text{H}$  NMR (300 MHz,  $\text{CDCl}_3$ ) of **8b**

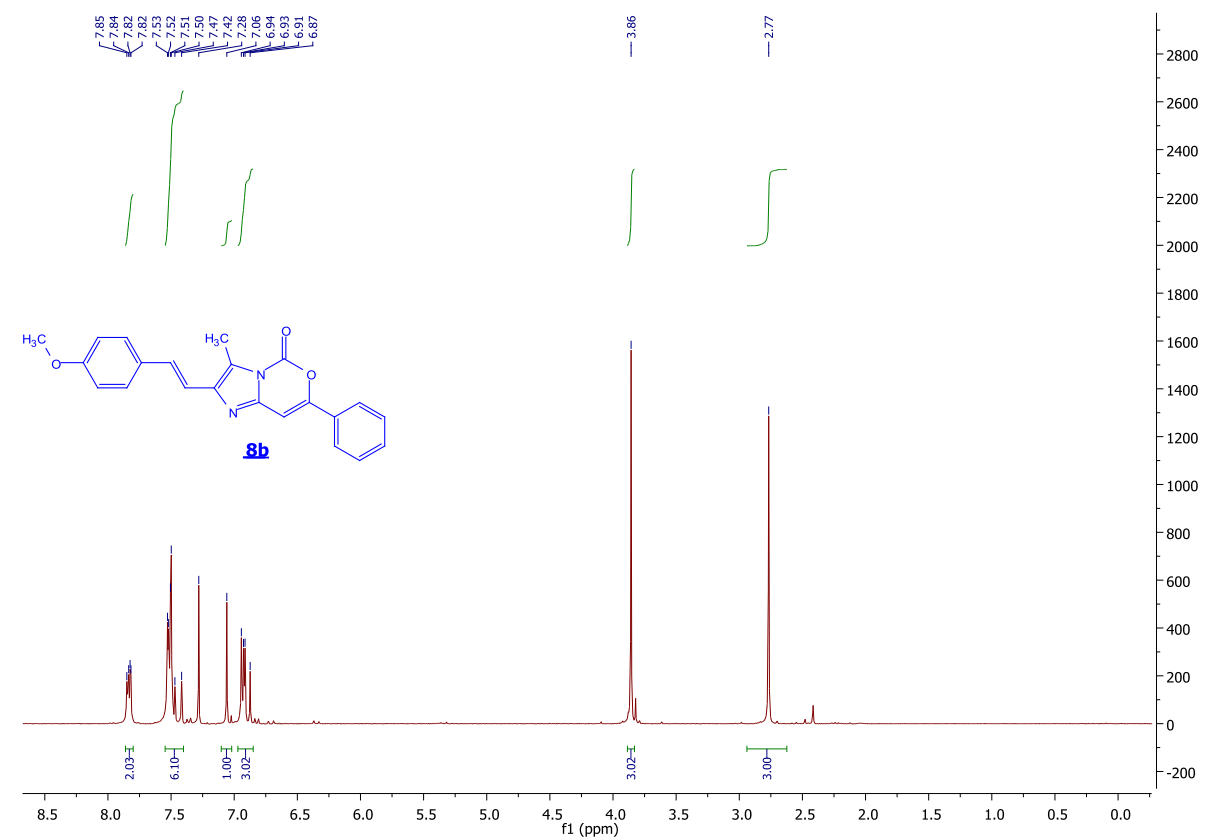

$^{13}\text{C}$  NMR (75 MHz,  $\text{CDCl}_3$ ) of **8b**

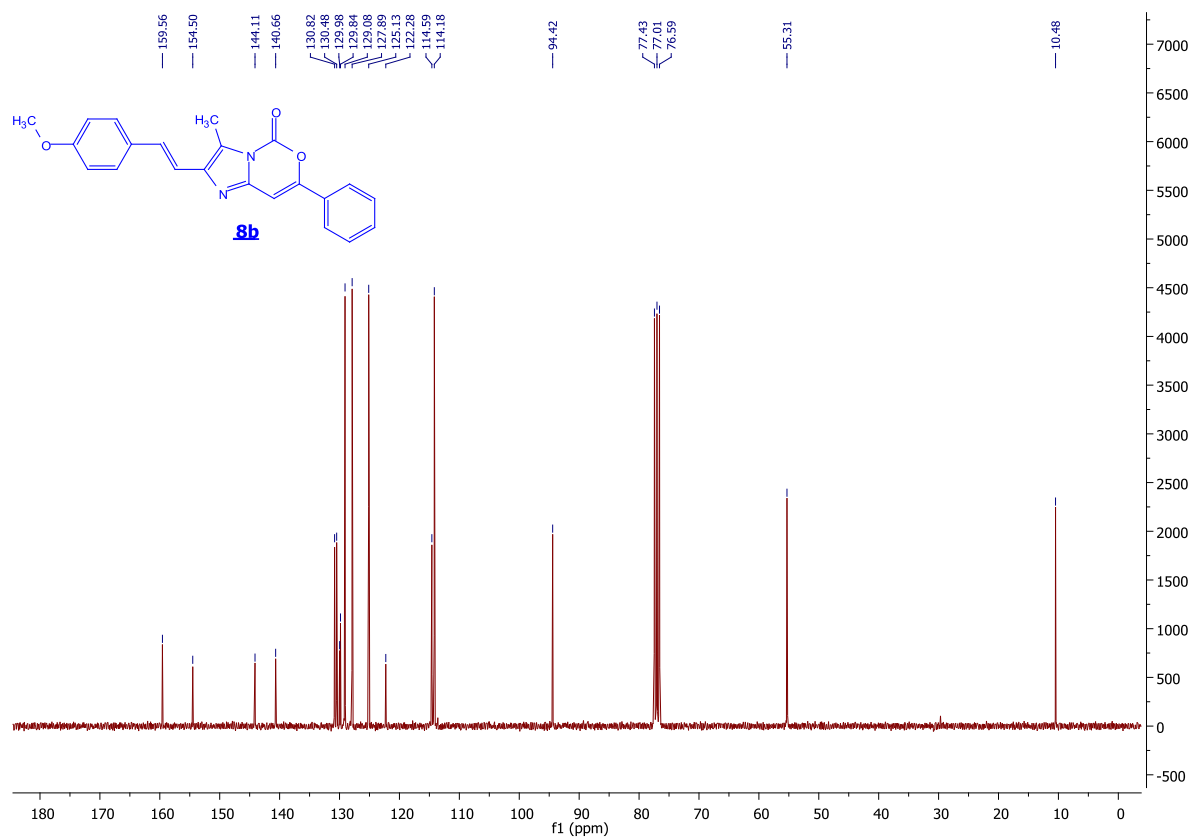

$^1\text{H}$  NMR (300 MHz,  $\text{CDCl}_3$ ) of **8c**

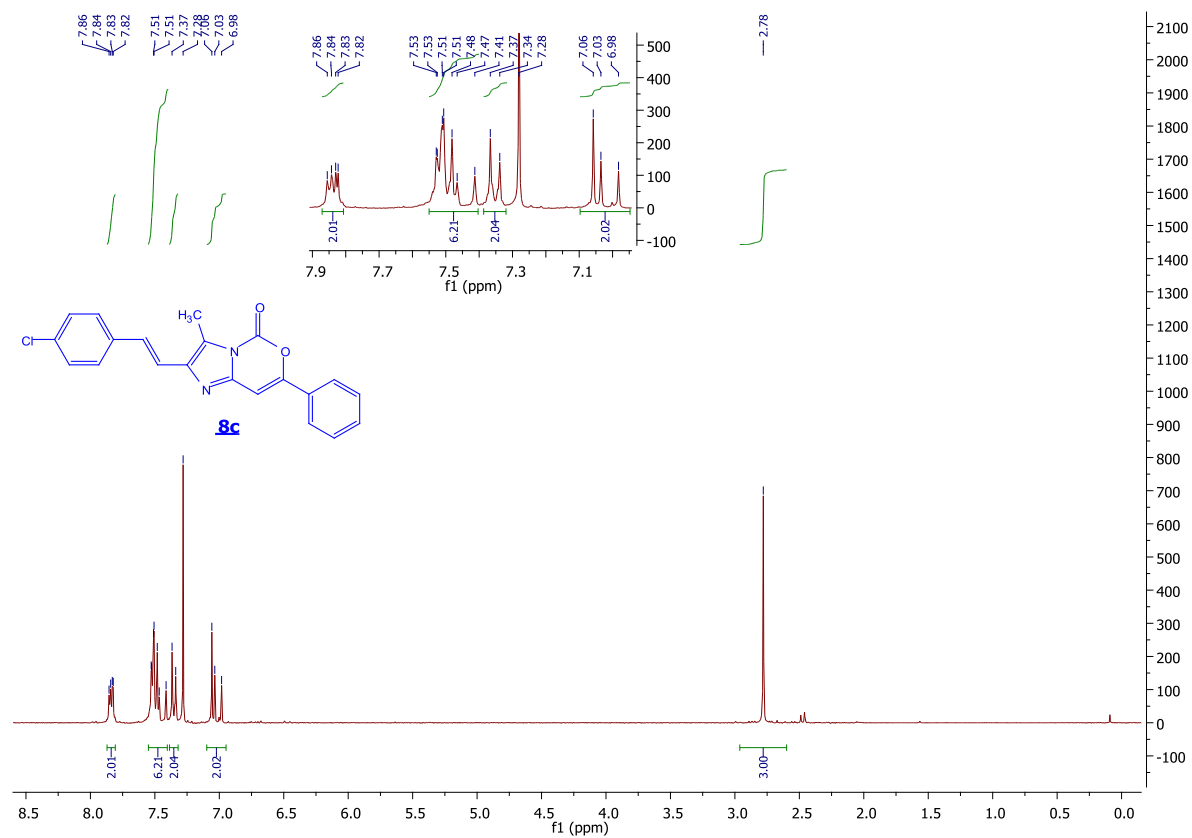

$^{13}\text{C}$  NMR (75 MHz,  $\text{CDCl}_3$ ) of **8c**

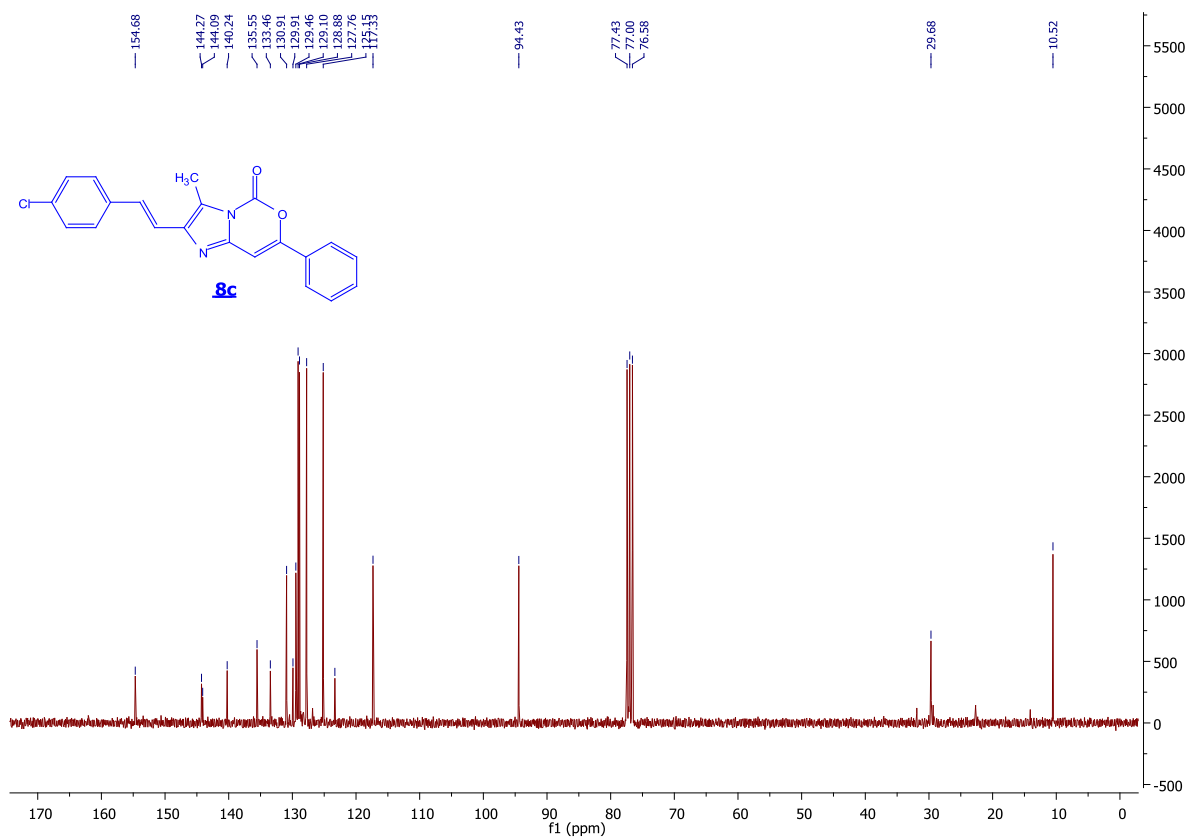



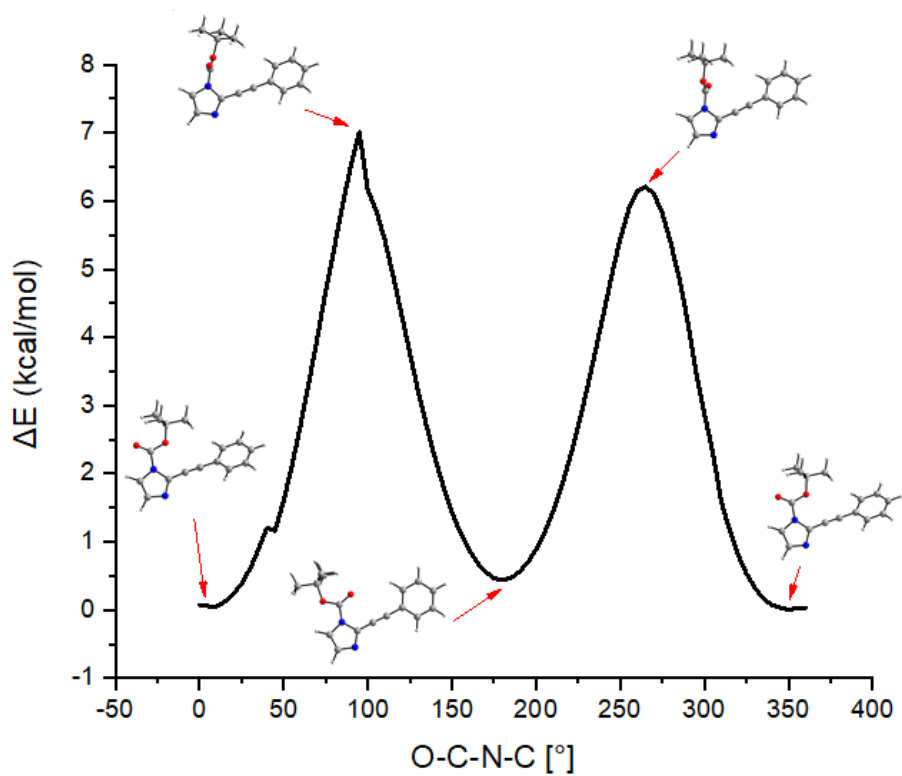

**Figure 3:** Rotational barrier and conformers of *N*-Boc imidazole **2n**.
